# Supplementary material for: Synthesis and Antifouling Activity Evaluation of Analogs of Bromosphaerol, a Brominated Diterpene Isolated from the Red Alga Sphaerococcus coronopifolius
Source: MDPI journal article supplement (doi:10.3390/md20010007), 2021-12-22
Supplement: s1 [file s1]

**Supplementary Materials for**

**Synthesis and Antifouling Activity Evaluation of**

**Analogues of Bromosphaerol, a Brominated Diterpene**

**Isolated from the Red Alga *Sphaerococcus***

***coronopifolius***

**Kyriakos C. Prousis <sup>1</sup>, Stefanos Kikionis <sup>2</sup>, Efstathia Ioannou <sup>2</sup>, Silvia Morgana <sup>3</sup>, Marco Faimali <sup>3</sup>,  
Veronica Piazza <sup>3,\*</sup>, Theodora Calogeropoulou <sup>1,\*</sup> and Vassilios Roussis <sup>2,\*</sup>**

<sup>1</sup> Institute of Chemical Biology, National Hellenic Research Foundation, 48 Vassileos Constantinou Avenue, 11653 Athens, Greece; kyrprou@eie.gr (K.C.P.)

<sup>2</sup> Section of Pharmacognosy and Chemistry of Natural Products, Department of Pharmacy, National and Kapodistrian University of Athens, Panepistimiopolis Zografou, 15771 Athens, Greece; skikionis@pharm.uoa.gr (S.K.); eioannou@pharm.uoa.gr (E.I.)

<sup>3</sup> Institute for the Study of Anthropic Impacts and Sustainability in Marine Environment (IAS), National Research Council (CNR), Via De Marini 6, 16149 Genova, Italy; silvia.morgana@ias.cnr.it (S.M.); marco.faimali@ias.cnr.it (M.F.)

\* Correspondence: veronica.piazza@ias.cnr.it (V.P.); tcalog@eie.gr (T.C.); roussis@pharm.uoa.gr (V.R.); Tel.: +39-010-6475409 (V.P.); +30-210-7273833 (T.C.); +30-210-7274592 (V.R.)

## Table of Contents

|                                                                                                  |    |
|--------------------------------------------------------------------------------------------------|----|
| <b>Figure S1.</b> $^1\text{H}$ NMR spectrum ( $\text{CDCl}_3$ , 400 MHz) of compound 1.....      | 4  |
| <b>Figure S2.</b> $^{13}\text{C}$ NMR spectrum ( $\text{CDCl}_3$ , 100 MHz) of compound 1. ....  | 4  |
| <b>Figure S3.</b> $^1\text{H}$ NMR spectrum ( $\text{CDCl}_3$ , 600 MHz) of compound 2.....      | 5  |
| <b>Figure S4.</b> $^{13}\text{C}$ NMR spectrum ( $\text{CDCl}_3$ , 75 MHz) of compound 2. ....   | 5  |
| <b>Figure S5.</b> HSQC spectrum ( $\text{CDCl}_3$ , 600 MHz) of compound 2.....                  | 6  |
| <b>Figure S6.</b> COSY spectrum ( $\text{CDCl}_3$ , 600 MHz) of compound 2. ....                 | 6  |
| <b>Figure S7.</b> NOESY spectrum ( $\text{CDCl}_3$ , 600 MHz) of compound 2. ....                | 7  |
| <b>Figure S8.</b> $^1\text{H}$ NMR spectrum ( $\text{CDCl}_3$ , 400 MHz) of compound 3.....      | 7  |
| <b>Figure S9.</b> HSQC spectrum ( $\text{CDCl}_3$ , 400 MHz) of compound 3.....                  | 8  |
| <b>Figure S10.</b> HMBC spectrum ( $\text{CDCl}_3$ , 400 MHz) of compound 3.....                 | 8  |
| <b>Figure S11.</b> COSY spectrum ( $\text{CDCl}_3$ , 400 MHz) of compound 3. ....                | 9  |
| <b>Figure S12.</b> $^1\text{H}$ NMR spectrum ( $\text{CDCl}_3$ , 600 MHz) of compound 4.....     | 9  |
| <b>Figure S13.</b> HSQC spectrum ( $\text{CDCl}_3$ , 600 MHz) of compound 4.....                 | 10 |
| <b>Figure S14.</b> HMBC spectrum ( $\text{CDCl}_3$ , 400 MHz) of compound 4.....                 | 10 |
| <b>Figure S15.</b> COSY spectrum ( $\text{CDCl}_3$ , 400 MHz) of compound 4. ....                | 11 |
| <b>Figure S16.</b> $^1\text{H}$ NMR spectrum ( $\text{CDCl}_3$ , 600 MHz) of compound 5.....     | 11 |
| <b>Figure S17.</b> HSQC spectrum ( $\text{CDCl}_3$ , 600 MHz) of compound 5.....                 | 12 |
| <b>Figure S18.</b> HMBC spectrum ( $\text{CDCl}_3$ , 400 MHz) of compound 5.....                 | 12 |
| <b>Figure S19.</b> COSY spectrum ( $\text{CDCl}_3$ , 400 MHz) of compound 5. ....                | 13 |
| <b>Figure S20.</b> $^1\text{H}$ NMR spectrum ( $\text{CDCl}_3$ , 600 MHz) of compound 6.....     | 13 |
| <b>Figure S21.</b> $^{13}\text{C}$ NMR spectrum ( $\text{CDCl}_3$ , 150 MHz) of compound 6. .... | 14 |
| <b>Figure S22.</b> HSQC spectrum ( $\text{CDCl}_3$ , 600 MHz) of compound 6.....                 | 14 |
| <b>Figure S23.</b> HMBC spectrum ( $\text{CDCl}_3$ , 600 MHz) of compound 6.....                 | 15 |
| <b>Figure S24.</b> COSY spectrum ( $\text{CDCl}_3$ , 600 MHz) of compound 6. ....                | 15 |
| <b>Figure S25.</b> $^1\text{H}$ NMR spectrum ( $\text{CDCl}_3$ , 600 MHz) of compound 7.....     | 16 |
| <b>Figure S26.</b> $^{13}\text{C}$ NMR spectrum ( $\text{CDCl}_3$ , 75 MHz) of compound 7. ....  | 16 |
| <b>Figure S27.</b> COSY spectrum ( $\text{CDCl}_3$ , 600 MHz) of compound 7. ....                | 17 |
| <b>Figure S28.</b> $^1\text{H}$ NMR spectrum ( $\text{CDCl}_3$ , 600 MHz) of compound 8.....     | 17 |
| <b>Figure S29.</b> $^{13}\text{C}$ NMR spectrum ( $\text{CDCl}_3$ , 75 MHz) of compound 8. ....  | 18 |
| <b>Figure S30.</b> HSQC spectrum ( $\text{CDCl}_3$ , 600 MHz) of compound 8.....                 | 18 |
| <b>Figure S31.</b> HMBC spectrum ( $\text{CDCl}_3$ , 600 MHz) of compound 8.....                 | 19 |

|                                                                                                                                                                      |    |
|----------------------------------------------------------------------------------------------------------------------------------------------------------------------|----|
| <b>Figure S32.</b> COSY spectrum (CDCl <sub>3</sub> , 600 MHz) of compound <b>8</b> .                                                                                | 19 |
| <b>Figure S33.</b> NOESY spectrum (CDCl <sub>3</sub> , 600 MHz) of compound <b>8</b> .                                                                               | 20 |
| <b>Figure S34.</b> <sup>1</sup> H NMR spectrum (CDCl <sub>3</sub> , 600 MHz) of compound <b>9</b> .                                                                  | 20 |
| <b>Figure S35.</b> <sup>1</sup> H NMR spectrum (CDCl <sub>3</sub> , 600 MHz) of compound <b>10</b> .                                                                 | 21 |
| <b>Figure S36.</b> <sup>1</sup> H NMR spectrum (CDCl <sub>3</sub> , 600 MHz) of compound <b>11</b> (mixture of <i>E,Z</i> geometrical isomers).                      | 21 |
| <b>Figure S37.</b> <sup>13</sup> C NMR spectrum (CDCl <sub>3</sub> , 75 MHz) of compound <b>11</b> (mixture of <i>E,Z</i> geometrical isomers).                      | 22 |
| <b>Figure S38.</b> <sup>1</sup> H NMR spectrum (CDCl <sub>3</sub> , 600 MHz) of compound <b>12</b> (mixture of <i>E,Z</i> geometrical isomers).                      | 22 |
| <b>Figure S39.</b> <sup>13</sup> C NMR spectrum (CDCl <sub>3</sub> , 75 MHz) of compound <b>12</b> (mixture of <i>E,Z</i> geometrical isomers).                      | 23 |
| <b>Figure S40.</b> <sup>1</sup> H NMR spectrum (CDCl <sub>3</sub> , 600 MHz) of compound <b>13</b> (mixture of <i>E,Z</i> geometrical isomers).                      | 23 |
| <b>Figure S41.</b> <sup>13</sup> C NMR spectrum (CDCl <sub>3</sub> , 75 MHz) of compound <b>13</b> (mixture of <i>E,Z</i> geometrical isomers).                      | 24 |
| <b>Figure S42.</b> <sup>1</sup> H NMR spectrum (CDCl <sub>3</sub> / CD <sub>3</sub> OD, 600 MHz) of compound <b>14</b> (mixture of <i>E,Z</i> geometrical isomers).  | 24 |
| <b>Figure S43.</b> <sup>13</sup> C NMR spectrum (CDCl <sub>3</sub> / CD <sub>3</sub> OD, 150 MHz) of compound <b>14</b> (mixture of <i>E,Z</i> geometrical isomers). | 25 |
| <b>Figure S44.</b> <sup>1</sup> H NMR spectrum (CDCl <sub>3</sub> , 300 MHz) of compound <b>15</b> (mixture of <i>E,Z</i> geometrical isomers).                      | 25 |
| <b>Figure S45.</b> <sup>13</sup> C NMR spectrum (CDCl <sub>3</sub> , 75 MHz) of compound <b>15</b> (mixture of <i>E,Z</i> geometrical isomers).                      | 26 |
| <b>Figure S46.</b> <sup>1</sup> H NMR spectrum (CDCl <sub>3</sub> / CD <sub>3</sub> OD, 300 MHz) of compound <b>16</b> (mixture of <i>E,Z</i> geometrical isomers).  | 26 |
| <b>Figure S47.</b> <sup>13</sup> C NMR spectrum (CDCl <sub>3</sub> / CD <sub>3</sub> OD, 75 MHz) of compound <b>16</b> (mixture of <i>E,Z</i> geometrical isomers).  | 27 |

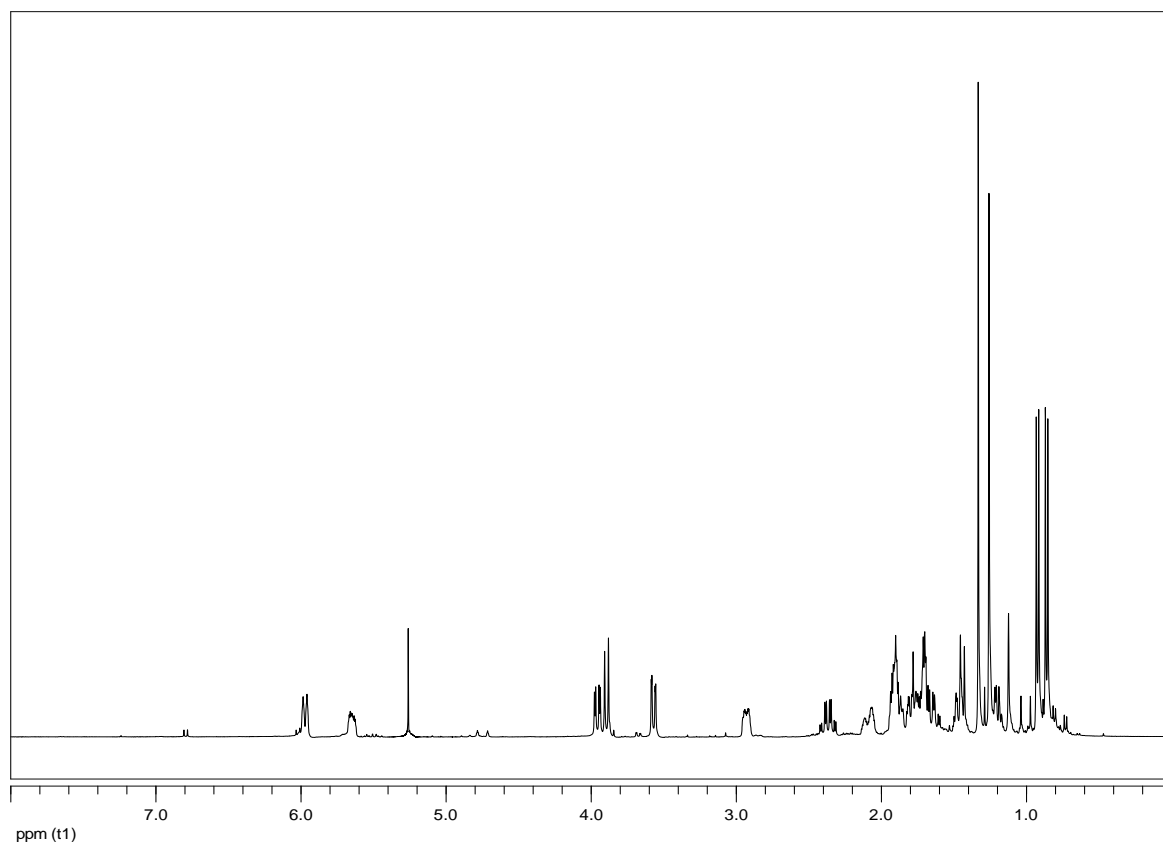

**Figure S1.**  $^1\text{H}$  NMR spectrum ( $\text{CDCl}_3$ , 400 MHz) of compound **1**.

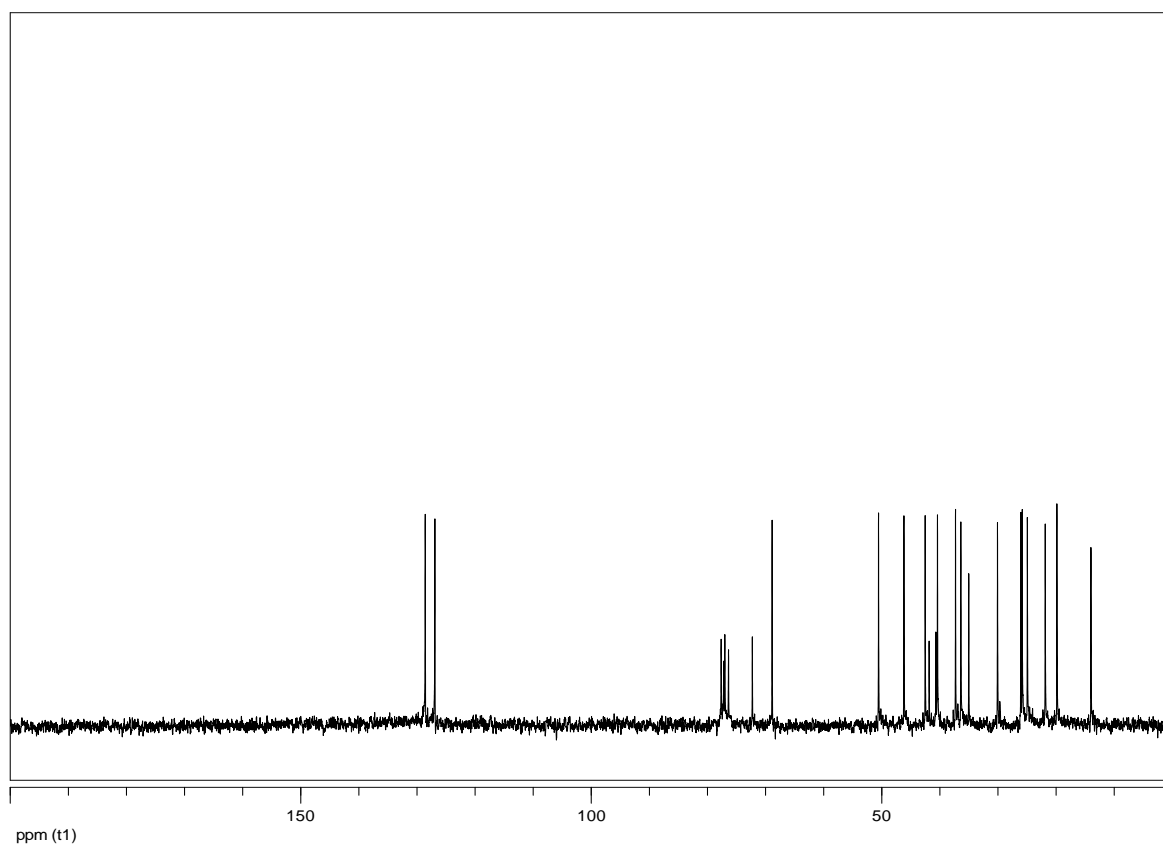

**Figure S2.**  $^{13}\text{C}$  NMR spectrum ( $\text{CDCl}_3$ , 100 MHz) of compound **1**.

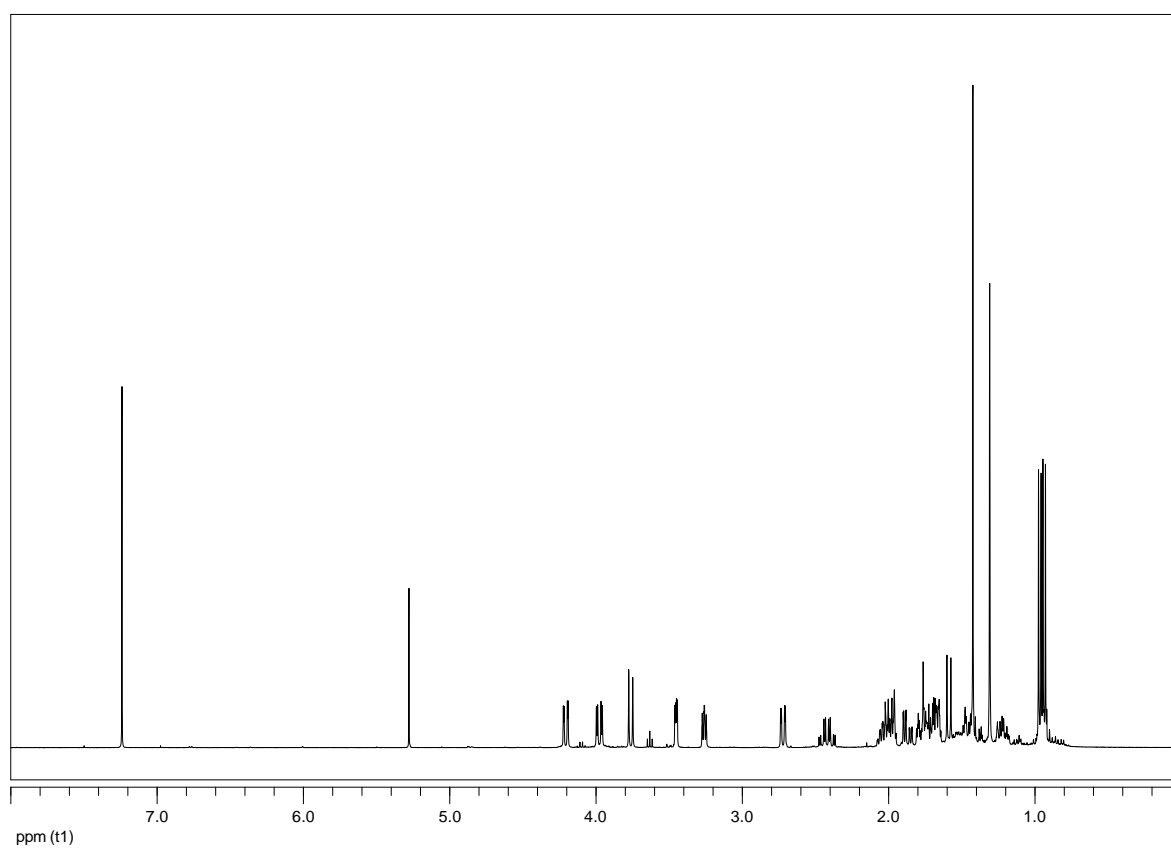

**Figure S3.**  $^1\text{H}$  NMR spectrum ( $\text{CDCl}_3$ , 600 MHz) of compound 2.

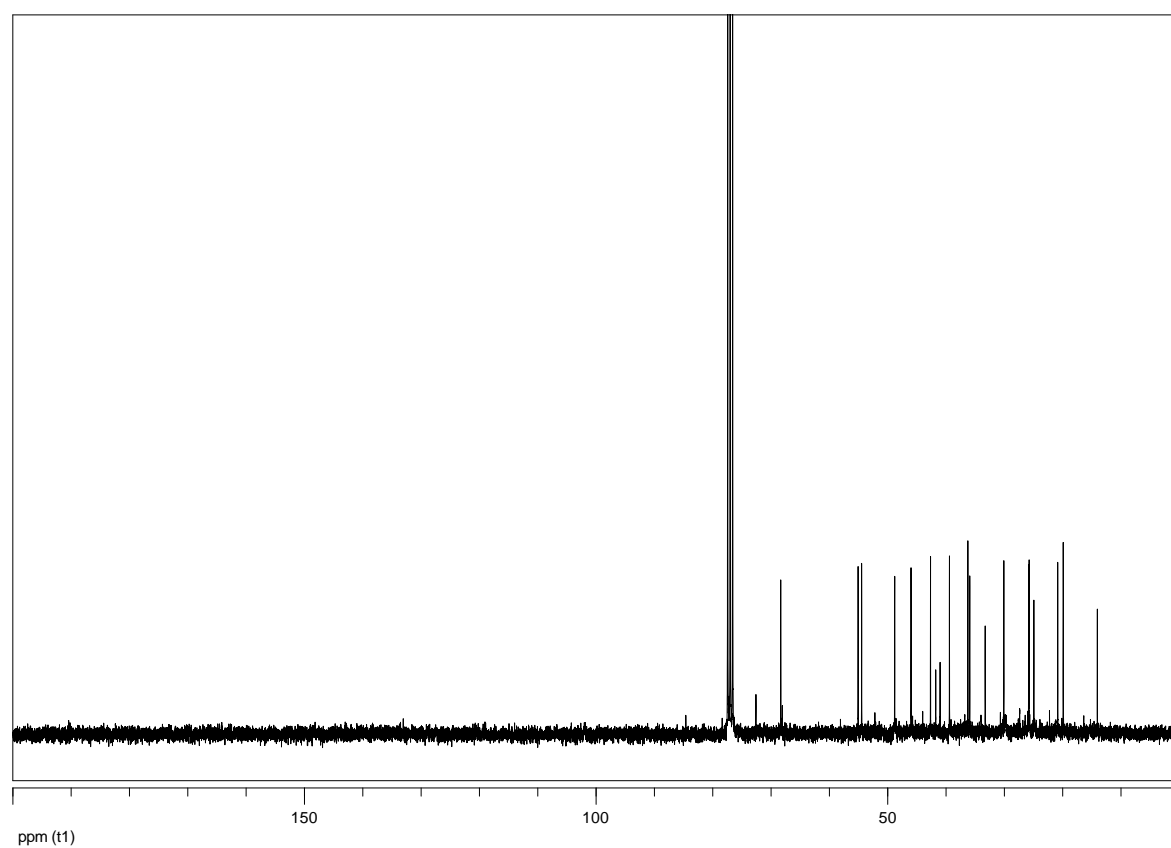

**Figure S4.**  $^{13}\text{C}$  NMR spectrum ( $\text{CDCl}_3$ , 75 MHz) of compound 2.

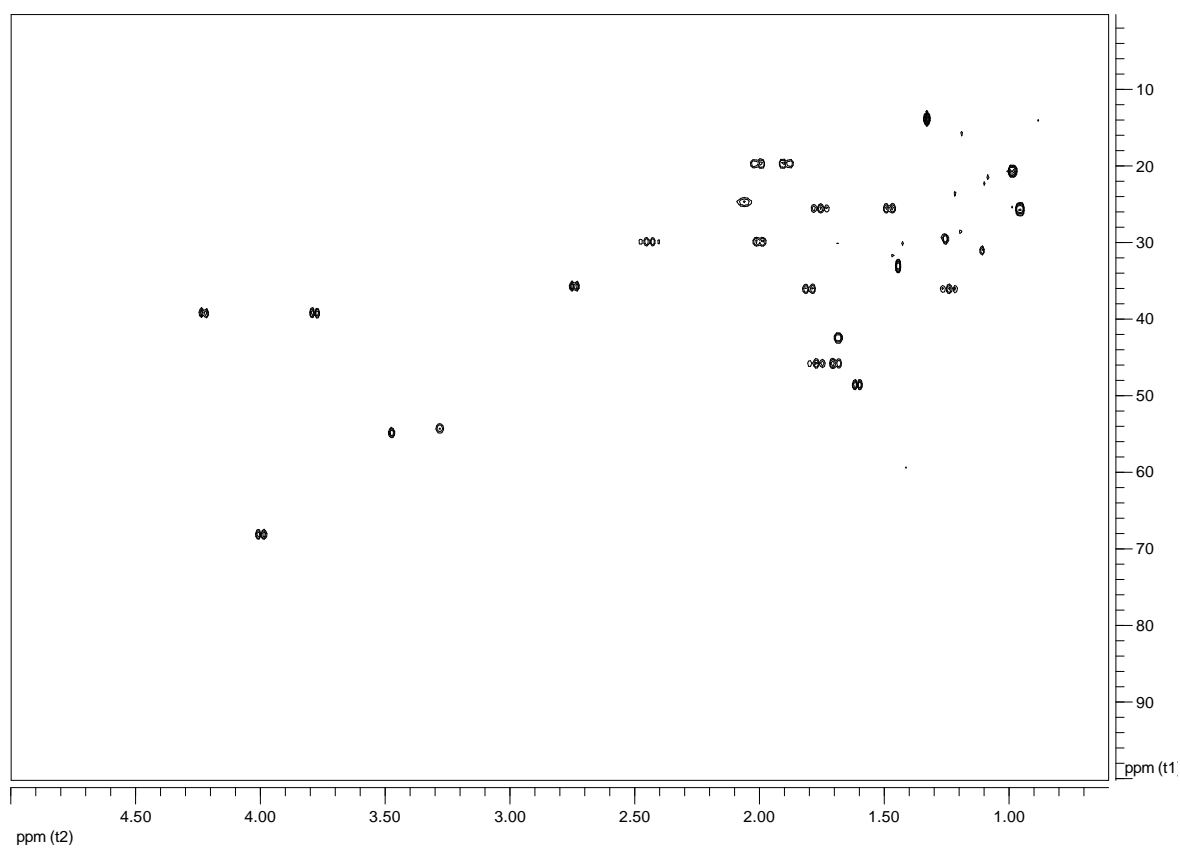

**Figure S5.** HSQC spectrum (CDCl<sub>3</sub>, 600 MHz) of compound **2**.

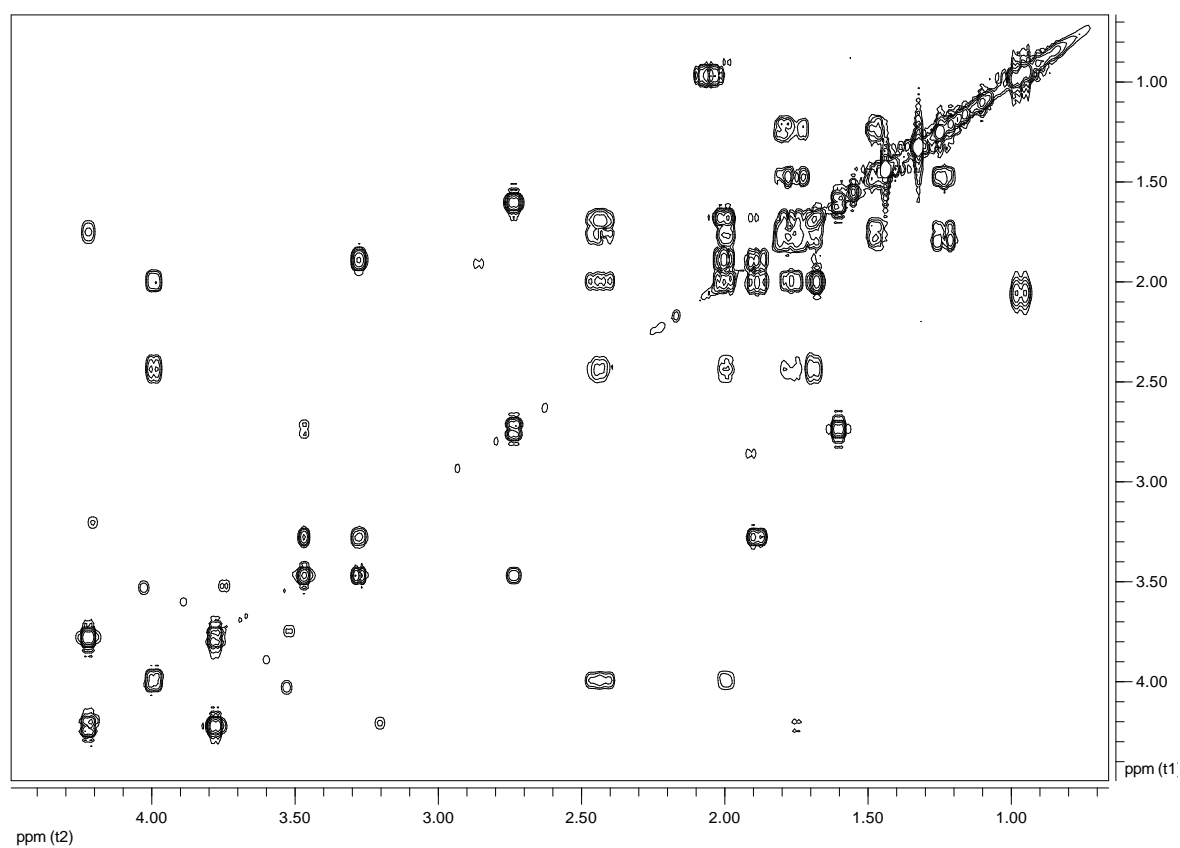

**Figure S6.** COSY spectrum (CDCl<sub>3</sub>, 600 MHz) of compound **2**.

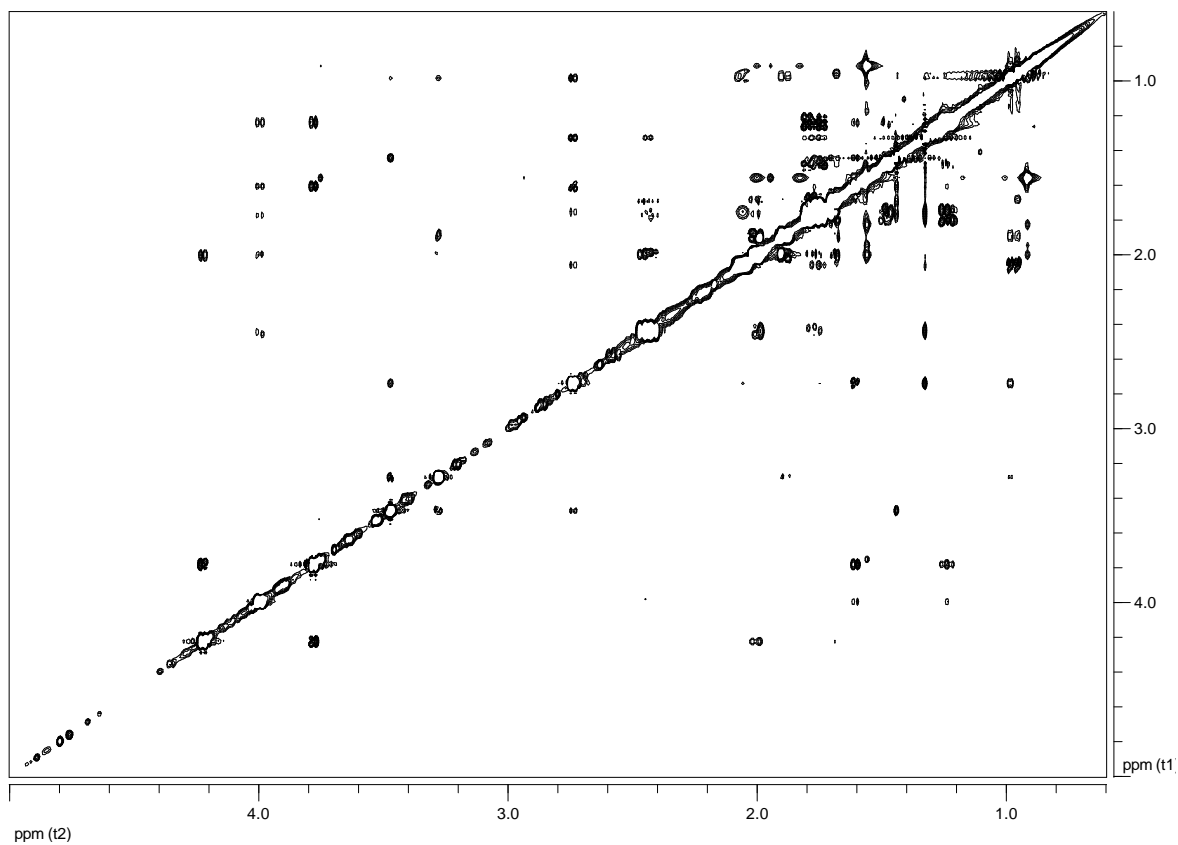

**Figure S7.** NOESY spectrum ( $\text{CDCl}_3$ , 600 MHz) of compound **2**.

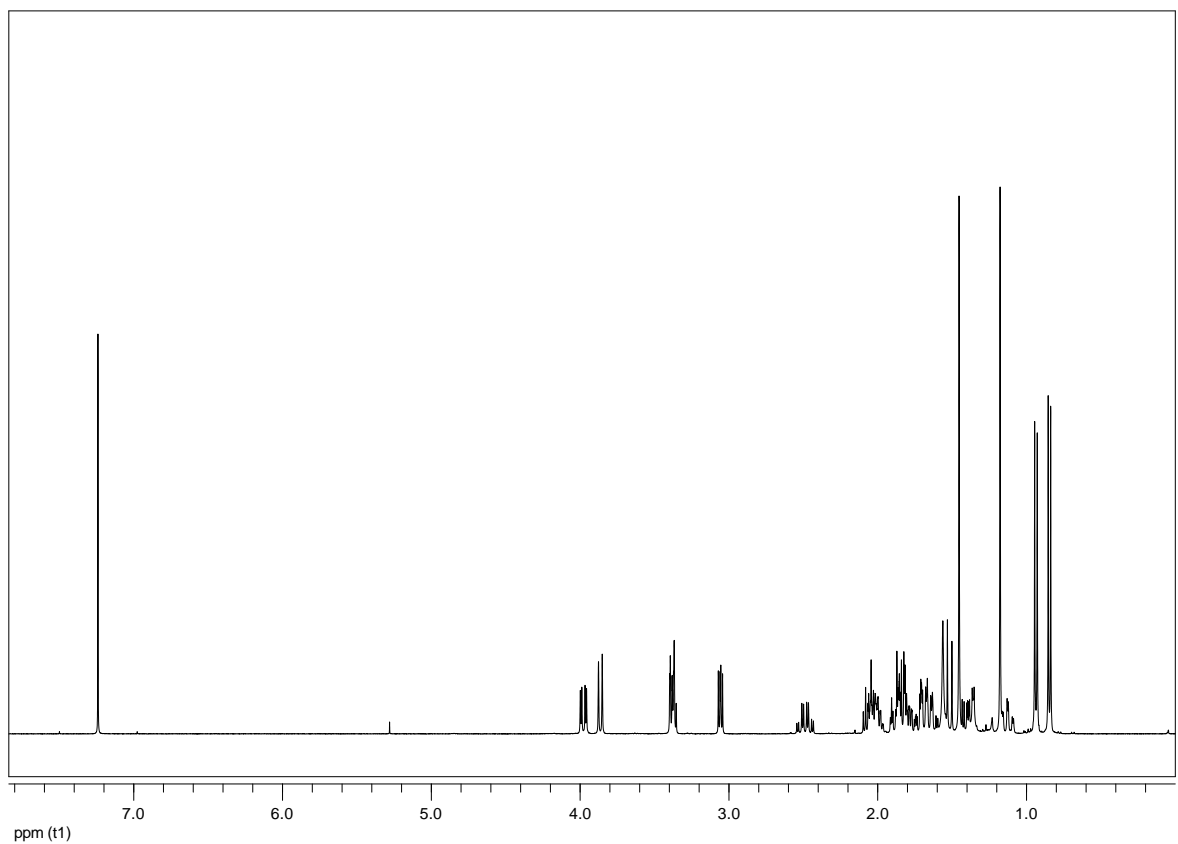

**Figure S8.**  $^1\text{H}$  NMR spectrum ( $\text{CDCl}_3$ , 400 MHz) of compound **3**.

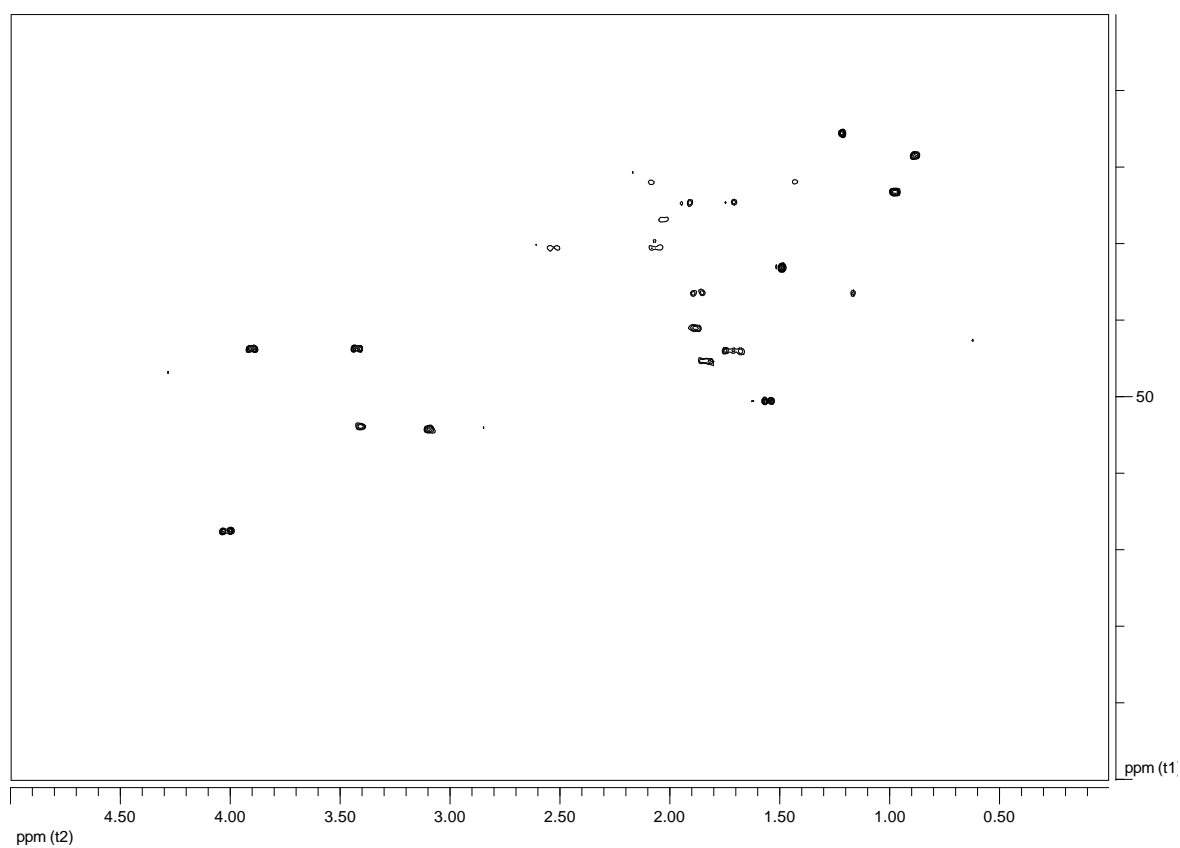

**Figure S9.** HSQC spectrum ( $\text{CDCl}_3$ , 400 MHz) of compound **3**.

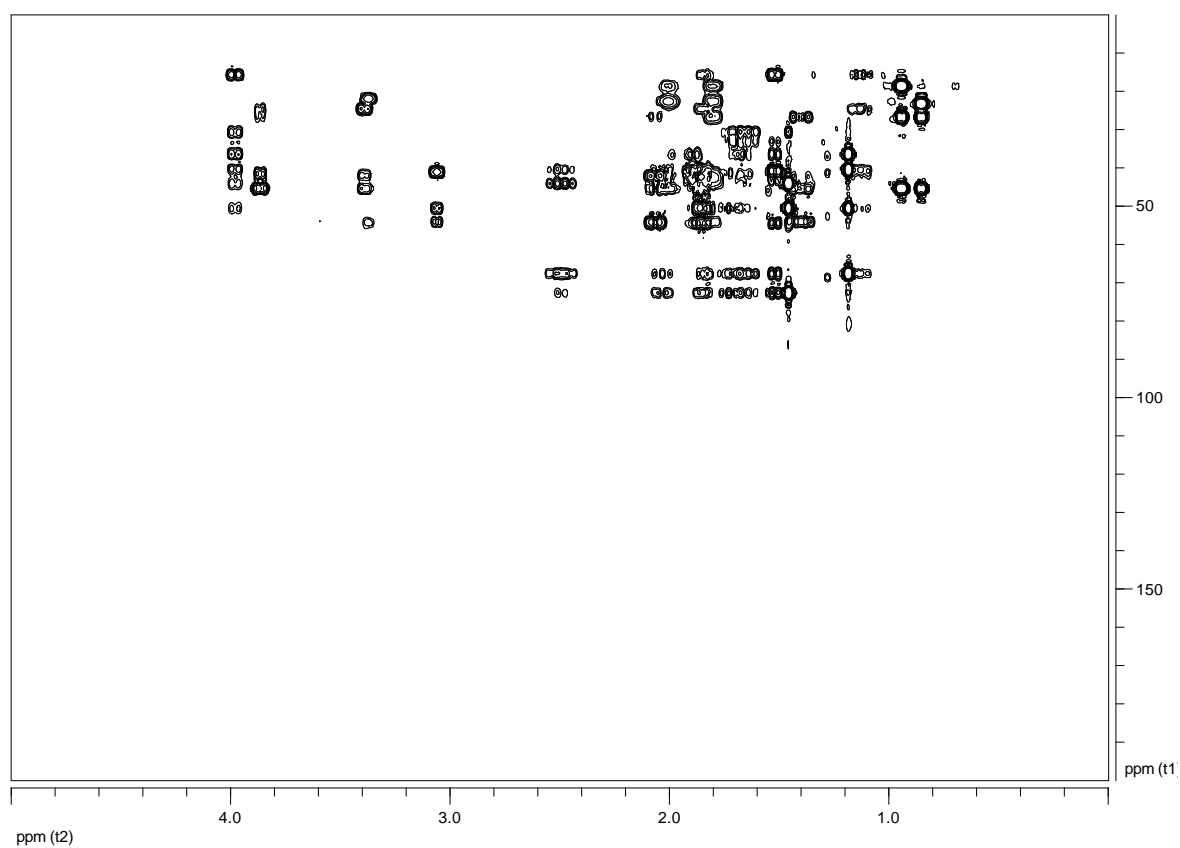

**Figure S10.** HMBC spectrum ( $\text{CDCl}_3$ , 400 MHz) of compound **3**.



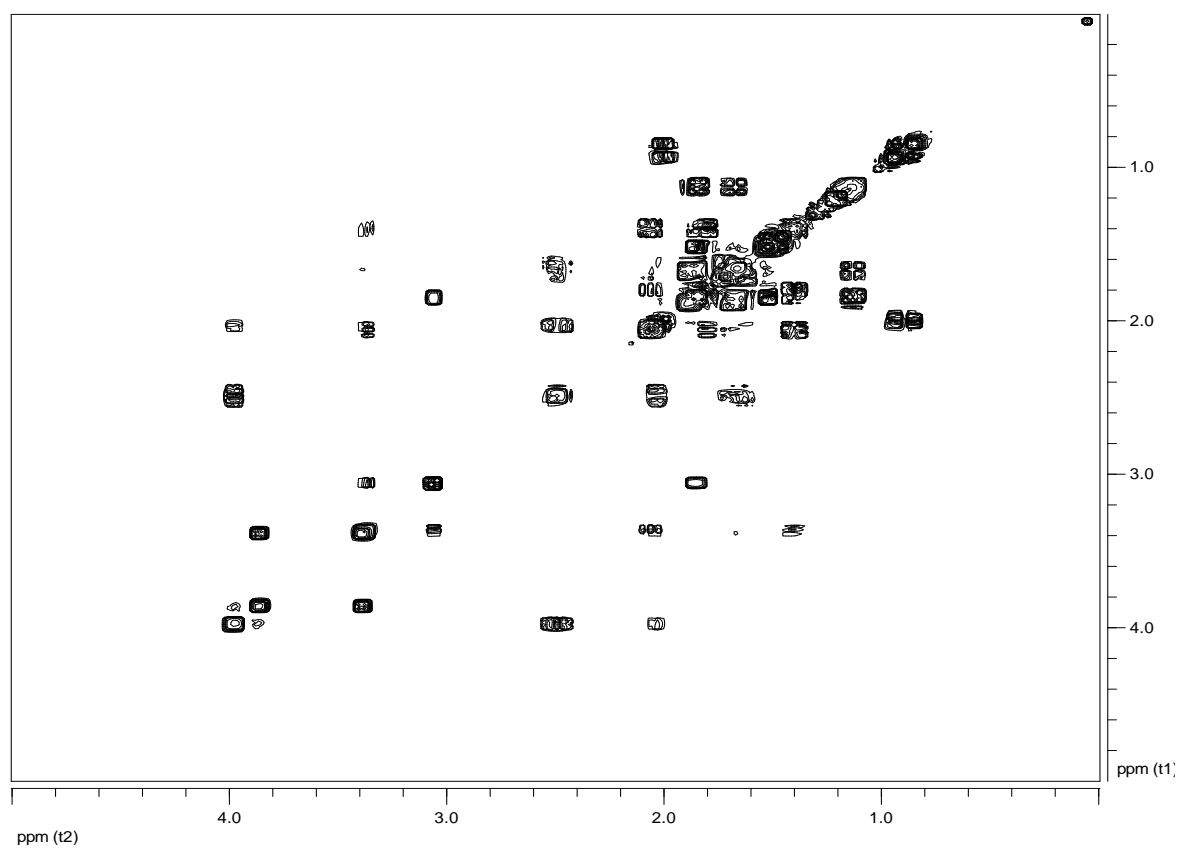

**Figure S11.** COSY spectrum (CDCl<sub>3</sub>, 400 MHz) of compound 3.

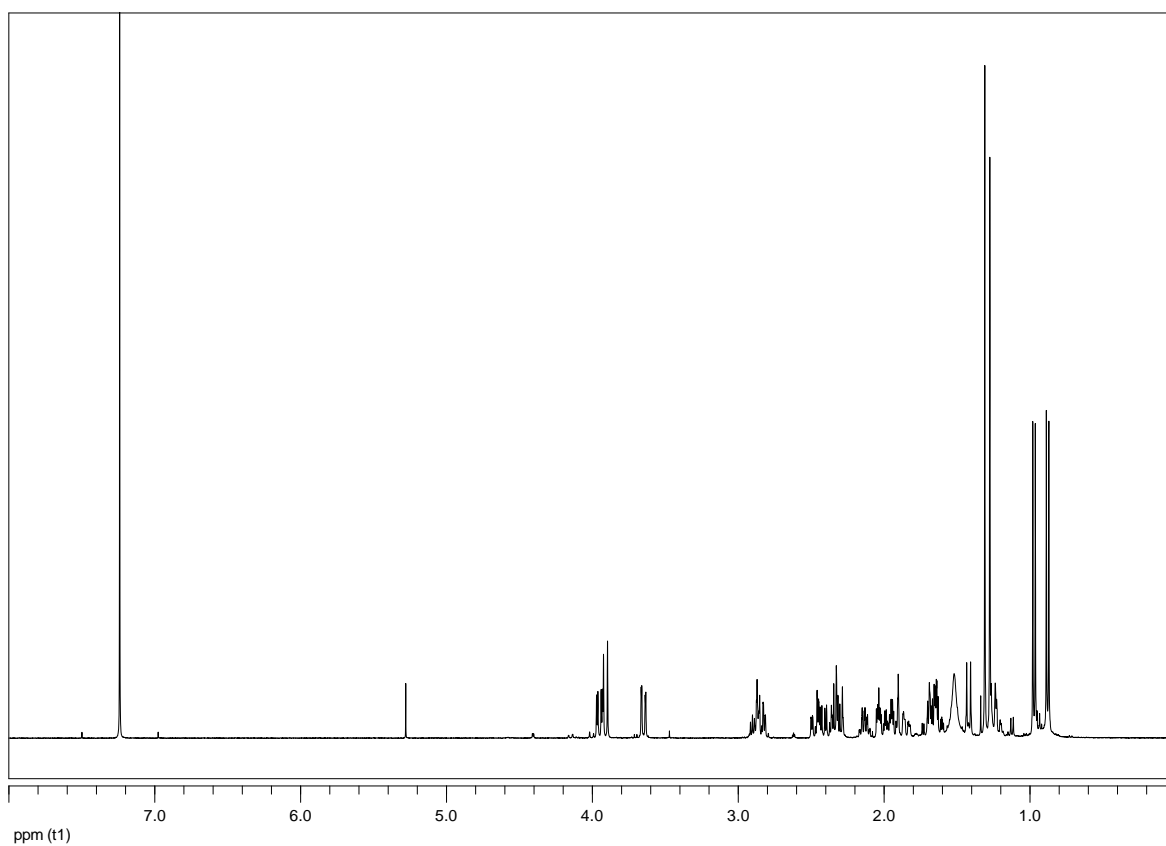

**Figure S12.** <sup>1</sup>H NMR spectrum (CDCl<sub>3</sub>, 600 MHz) of compound 4.

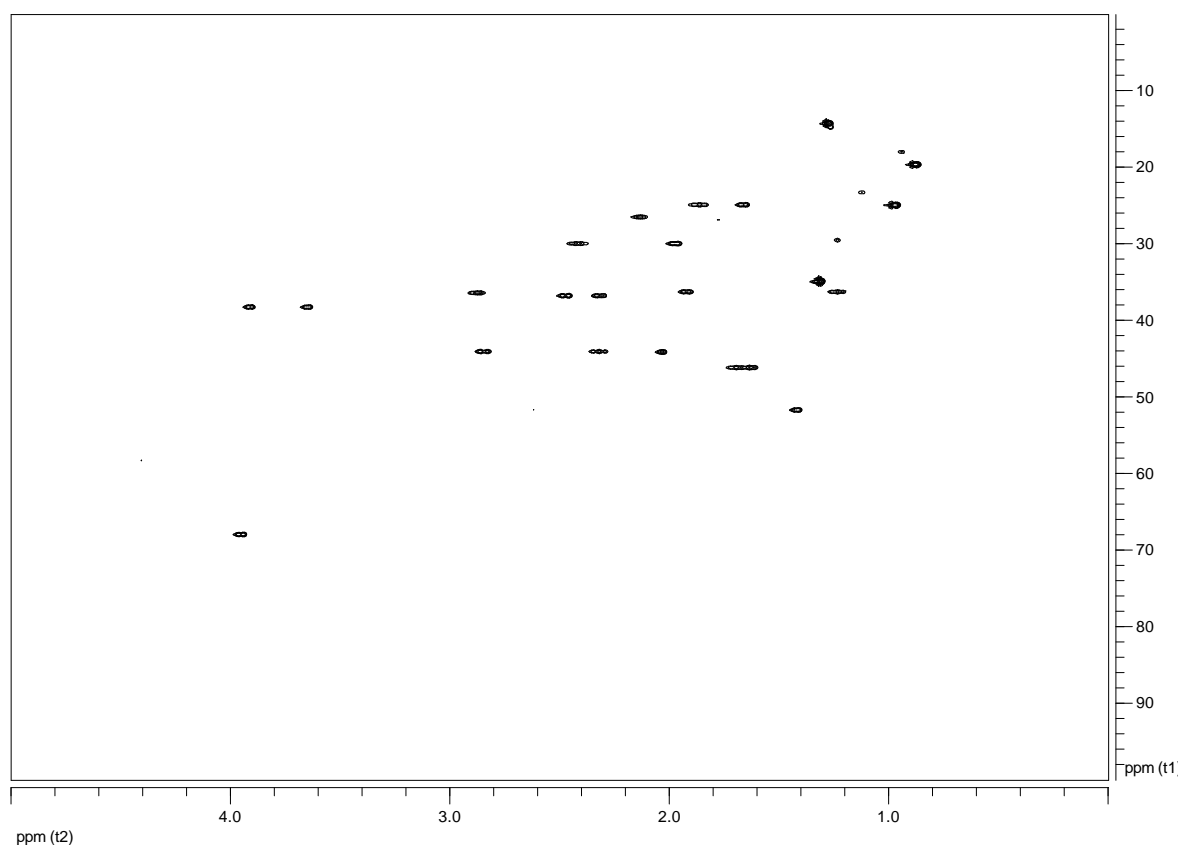

**Figure S13.** HSQC spectrum (CDCl<sub>3</sub>, 600 MHz) of compound **4**.

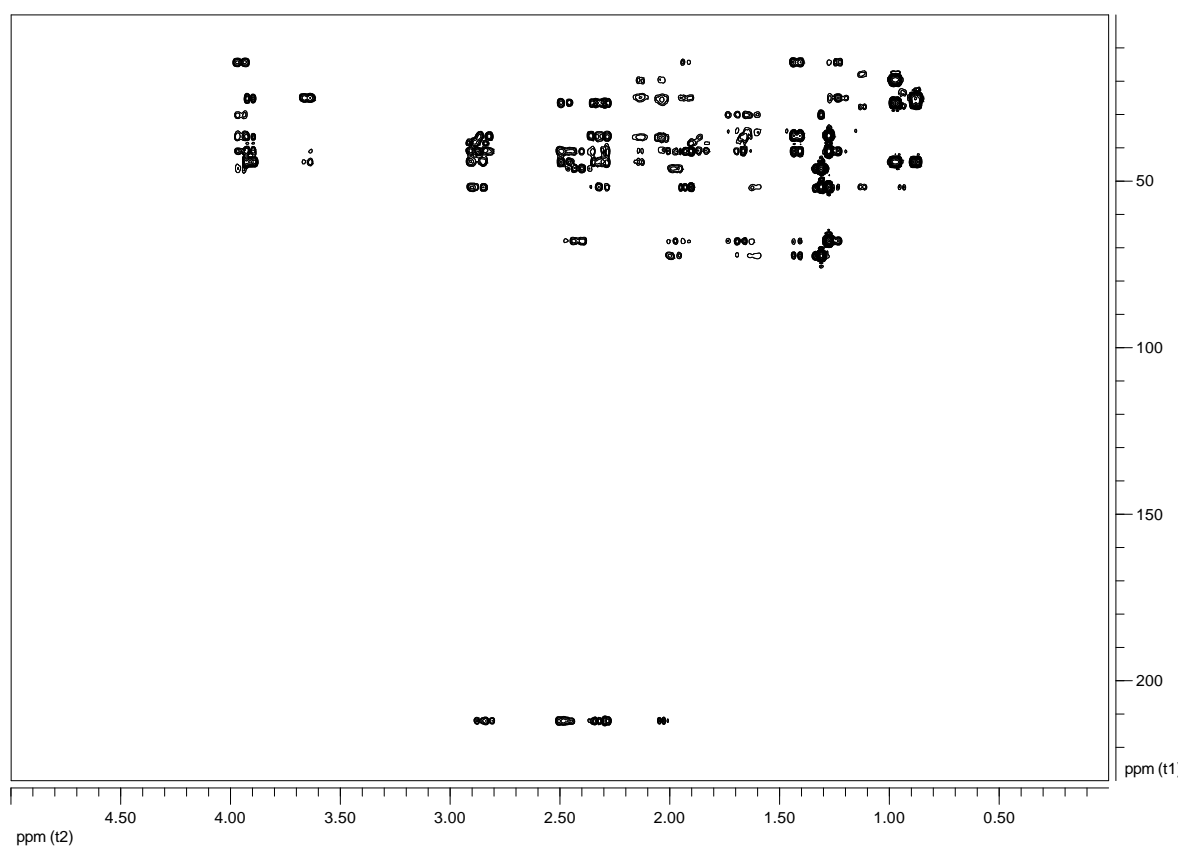

**Figure S14.** HMBC spectrum (CDCl<sub>3</sub>, 400 MHz) of compound **4**.

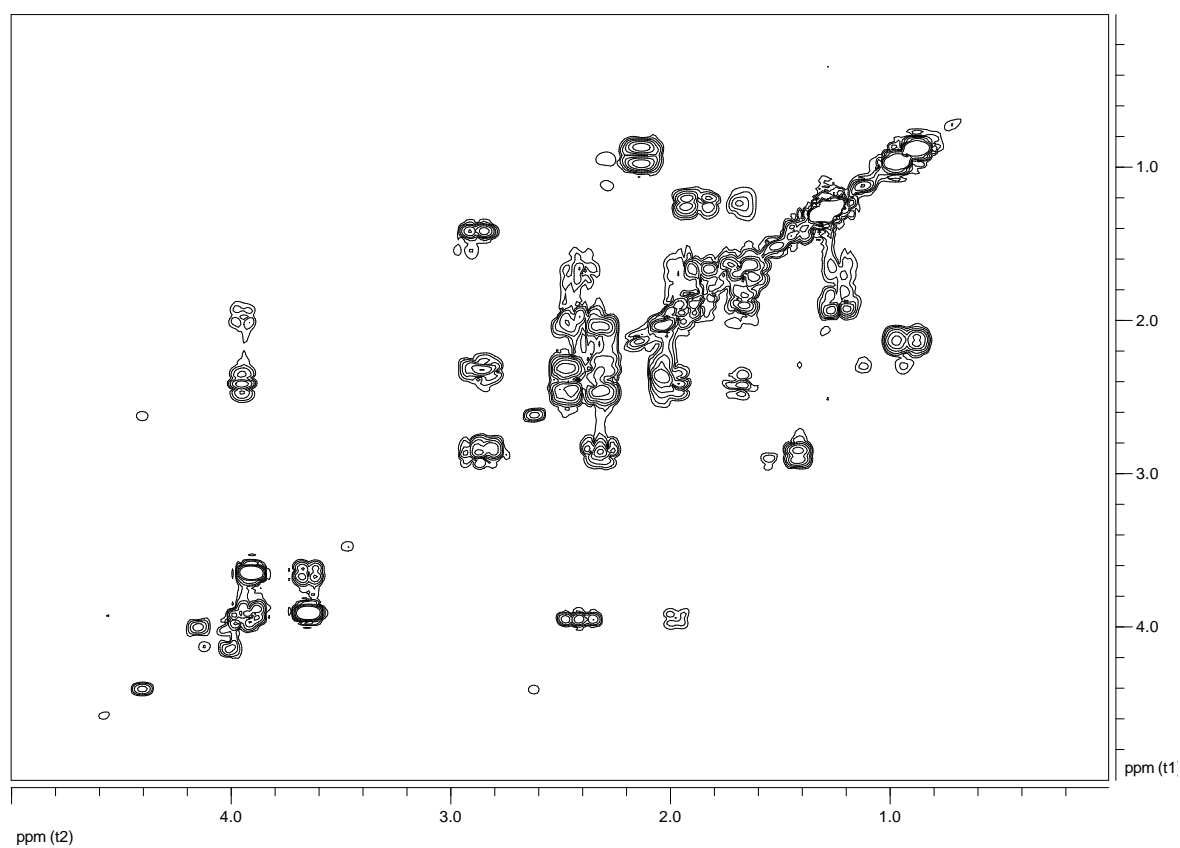

**Figure S15.** COSY spectrum (CDCl<sub>3</sub>, 400 MHz) of compound **4**.

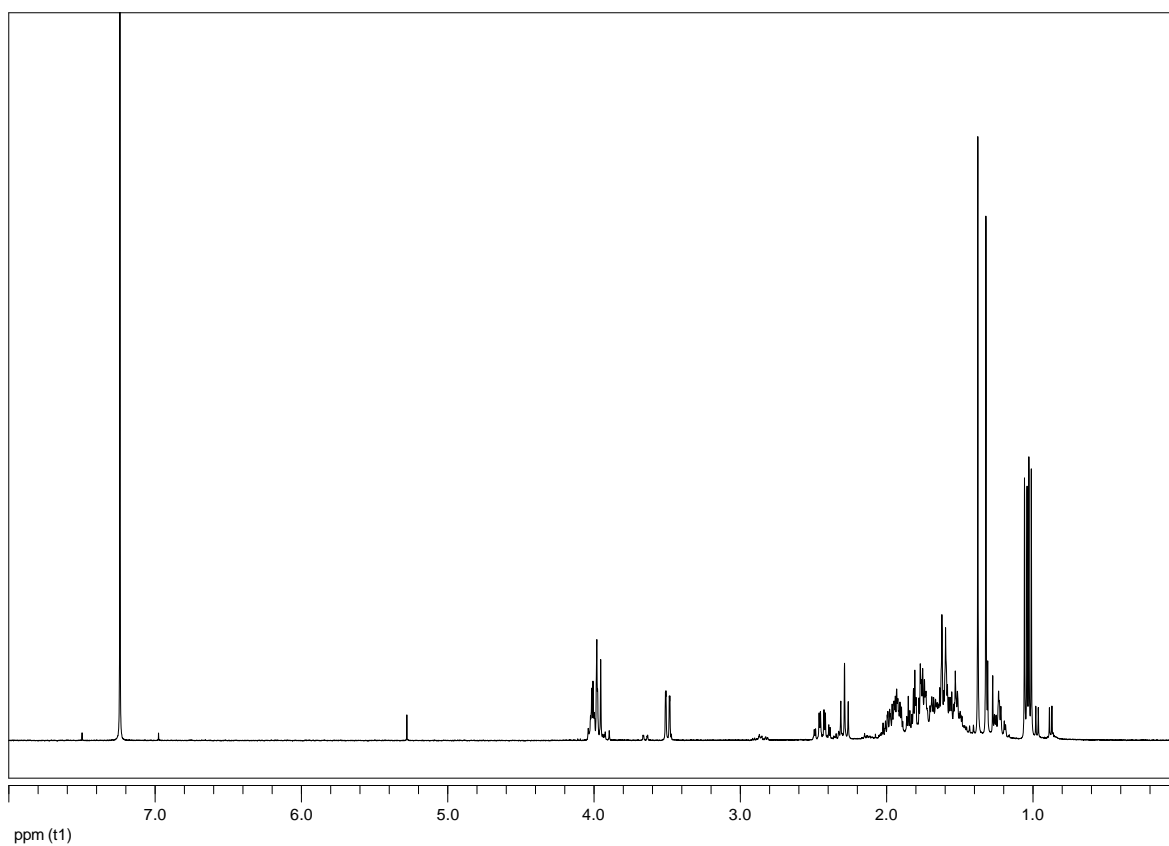

**Figure S16.** <sup>1</sup>H NMR spectrum (CDCl<sub>3</sub>, 600 MHz) of compound **5**.

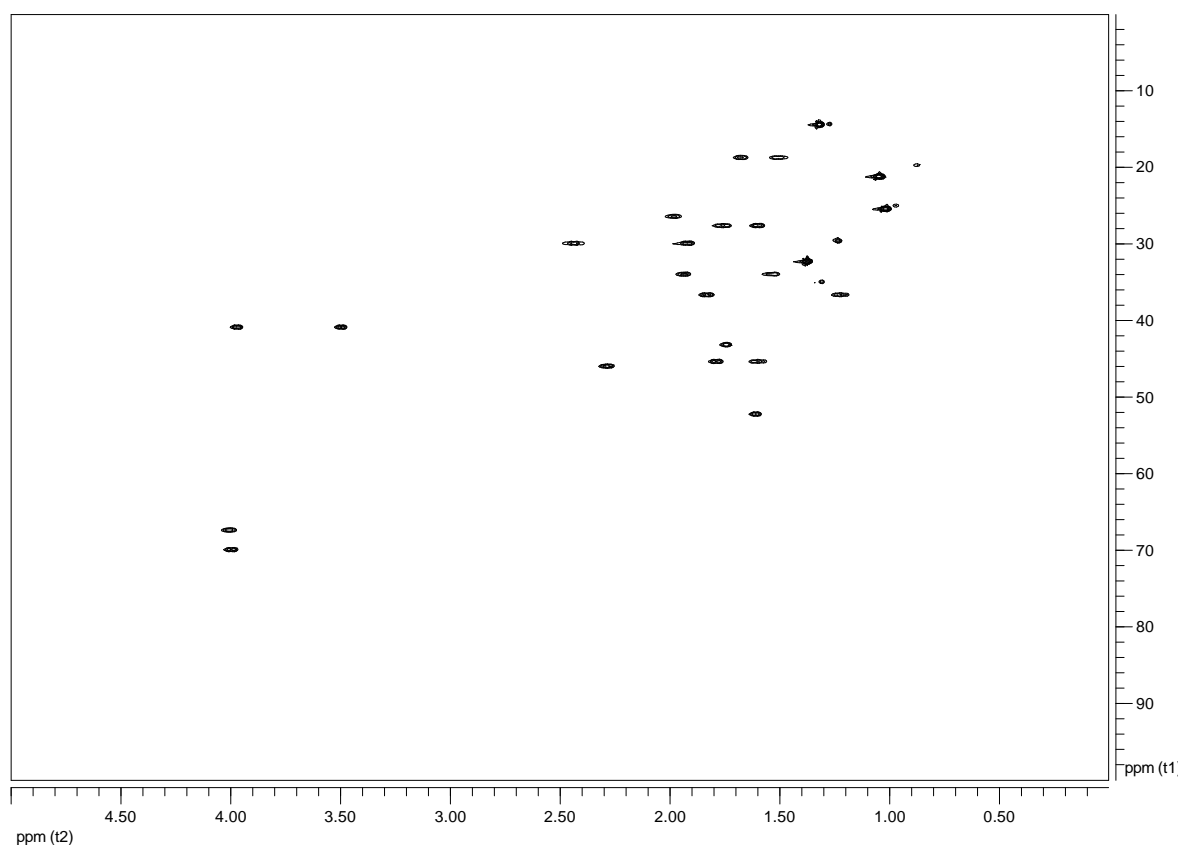

**Figure S17.** HSQC spectrum (CDCl<sub>3</sub>, 600 MHz) of compound **5**.

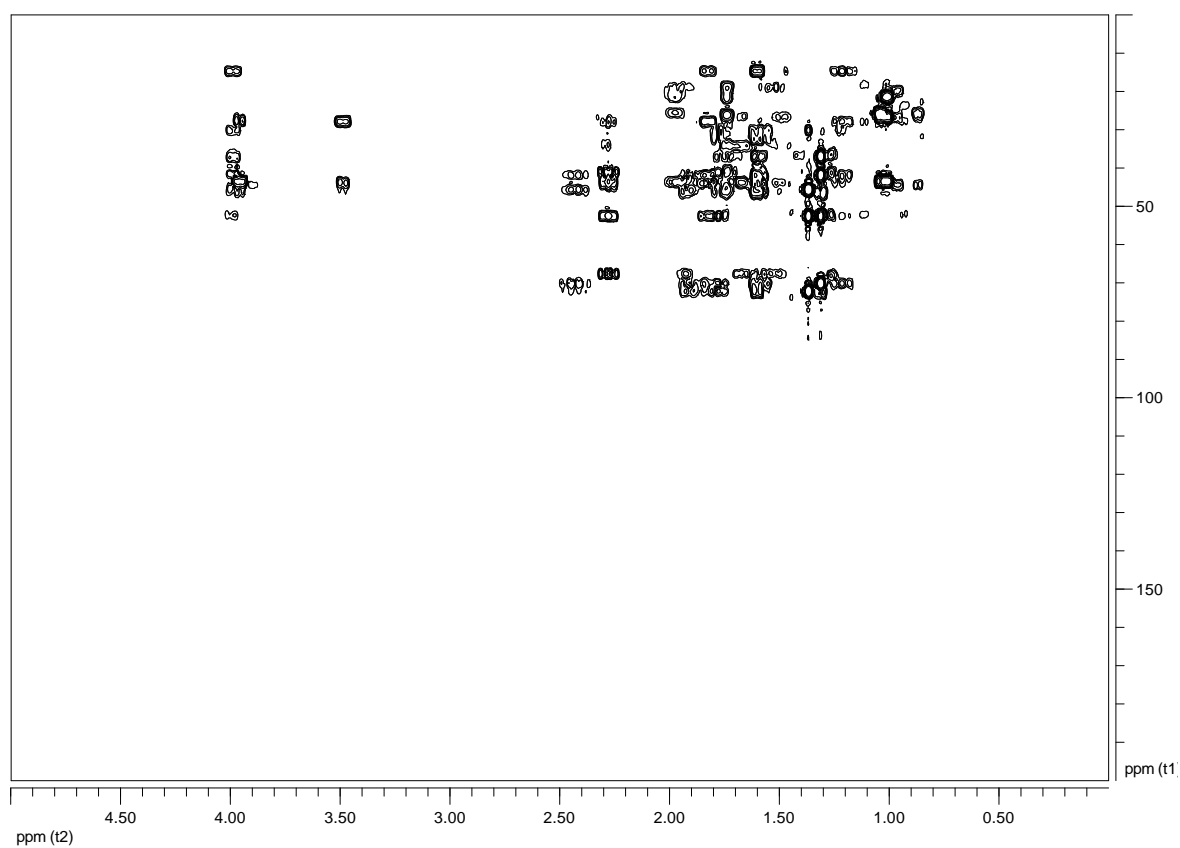

**Figure S18.** HMBC spectrum (CDCl<sub>3</sub>, 400 MHz) of compound **5**.

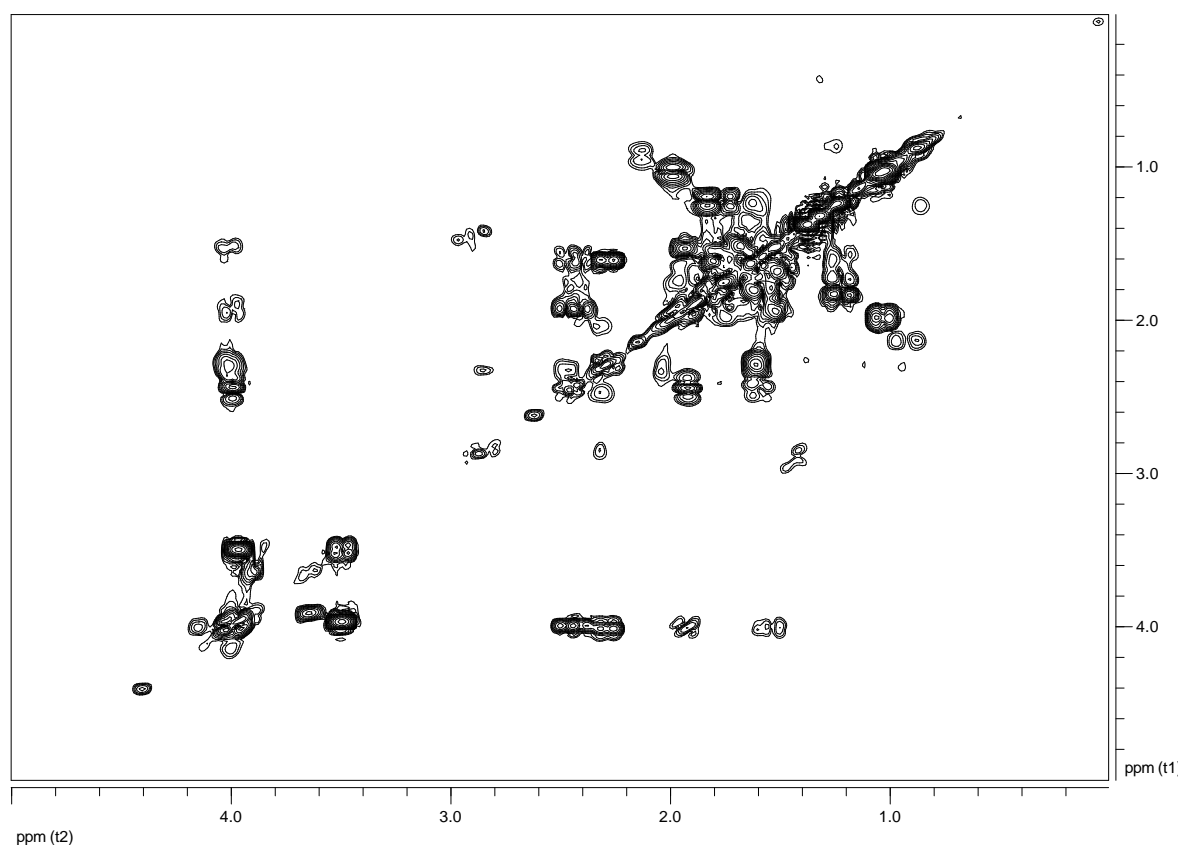

**Figure S19.** COSY spectrum (CDCl<sub>3</sub>, 400 MHz) of compound 5.

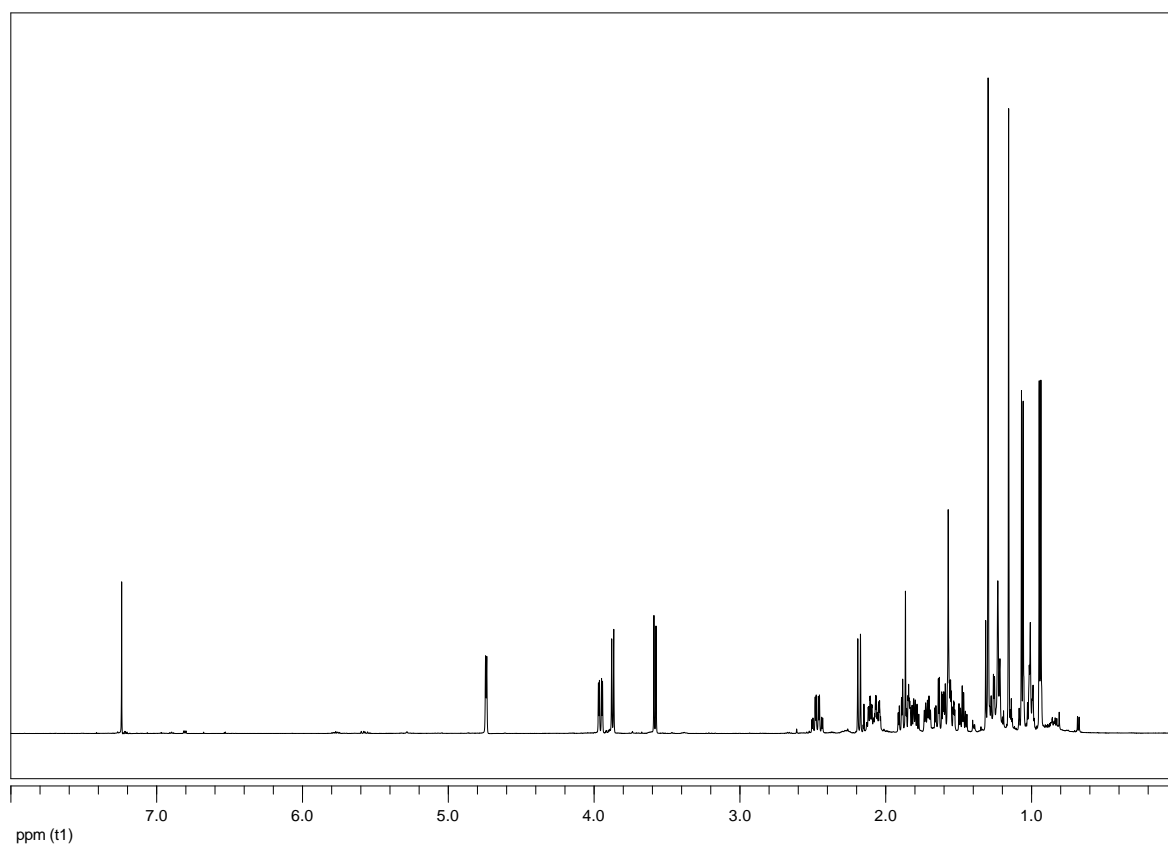

**Figure S20.** <sup>1</sup>H NMR spectrum (CDCl<sub>3</sub>, 600 MHz) of compound 6.

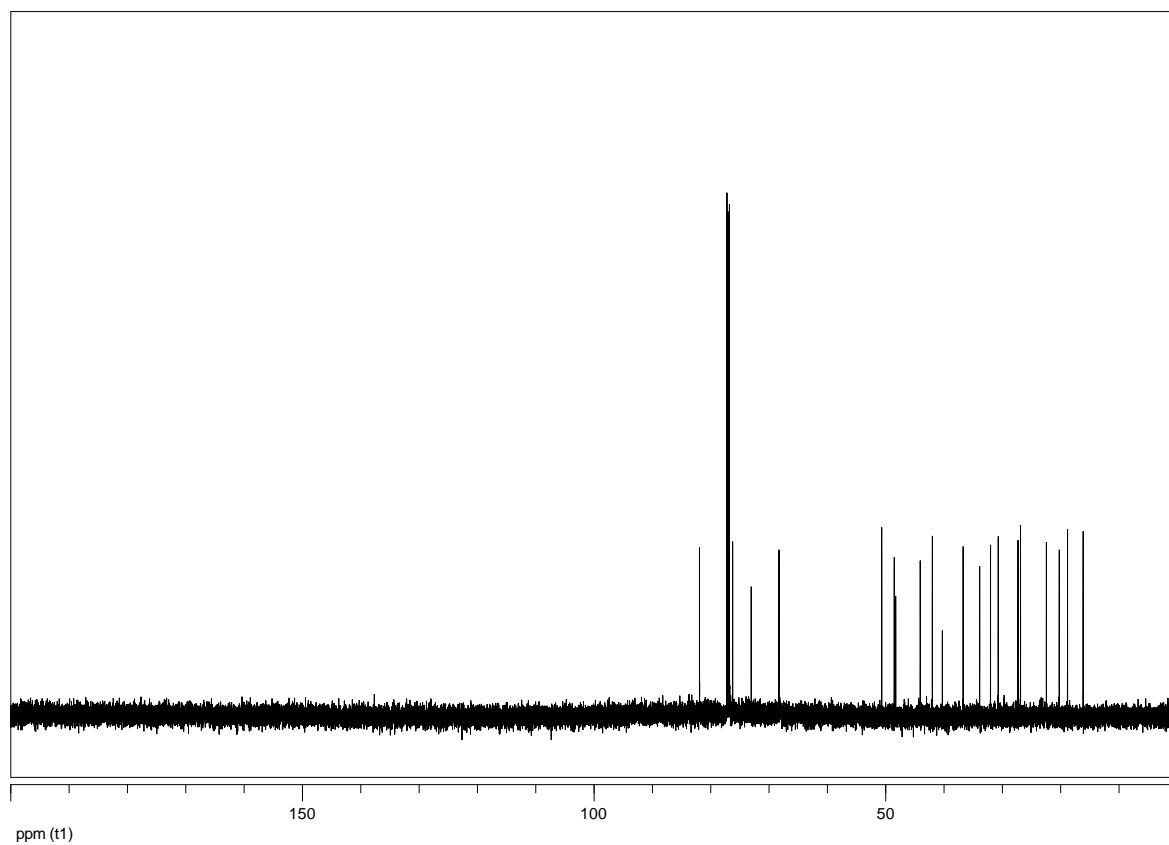

**Figure S21.**  $^{13}\text{C}$  NMR spectrum ( $\text{CDCl}_3$ , 150 MHz) of compound **6**.

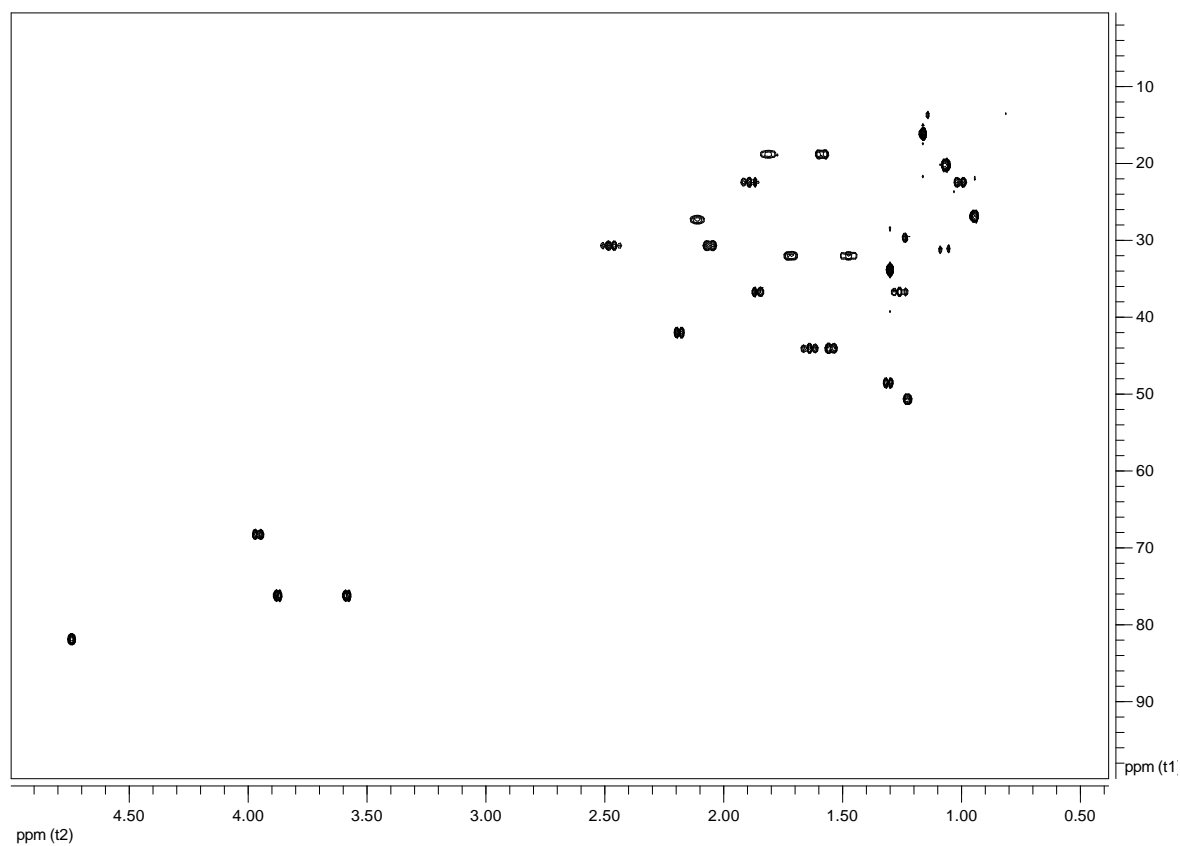

**Figure S22.** HSQC spectrum ( $\text{CDCl}_3$ , 600 MHz) of compound **6**.

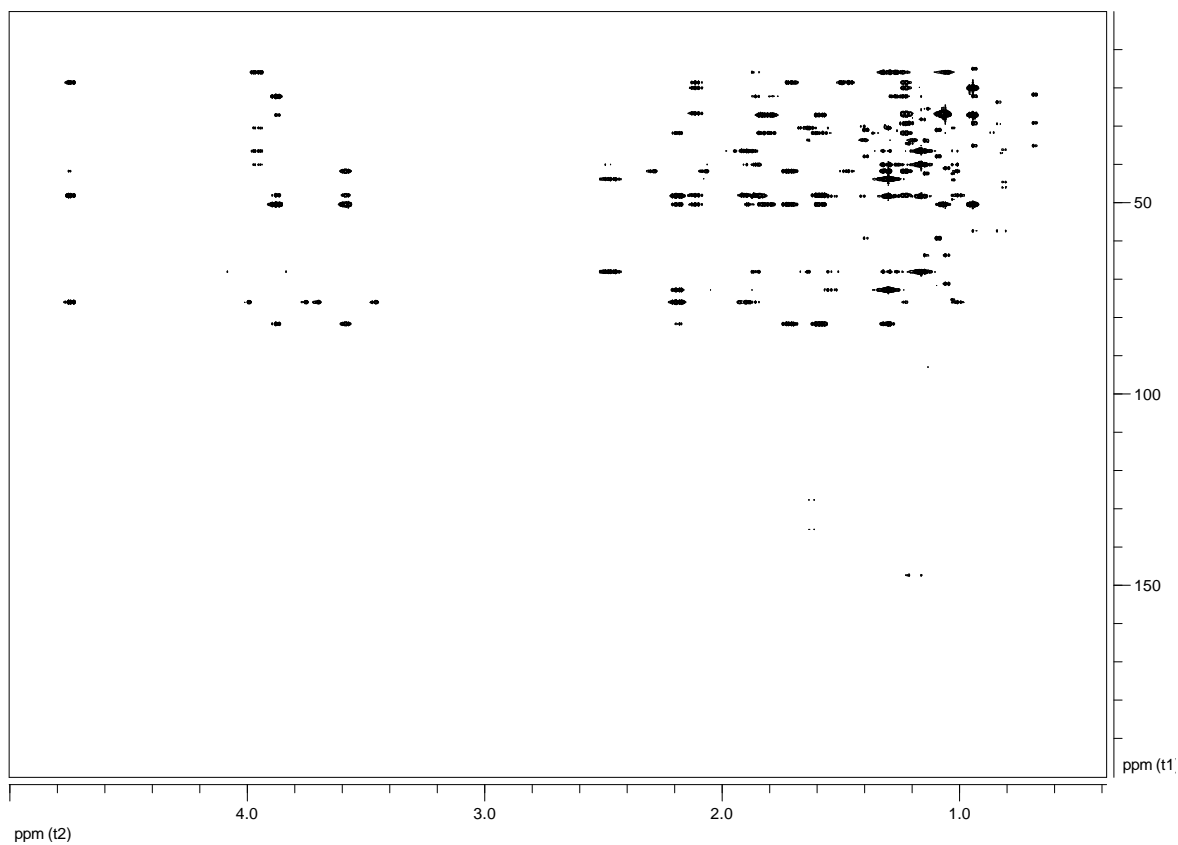

**Figure S23.** HMBC spectrum (CDCl<sub>3</sub>, 600 MHz) of compound **6**.

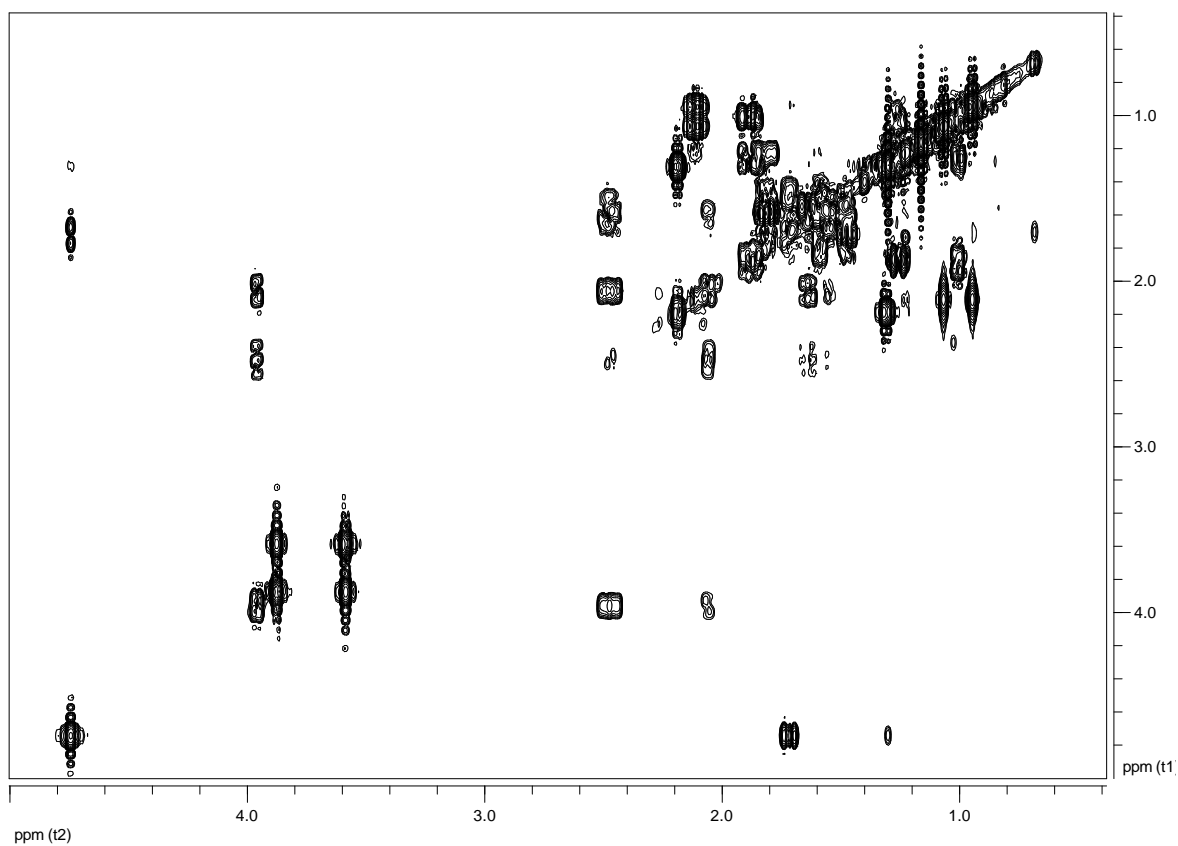

**Figure S24.** COSY spectrum (CDCl<sub>3</sub>, 600 MHz) of compound **6**.

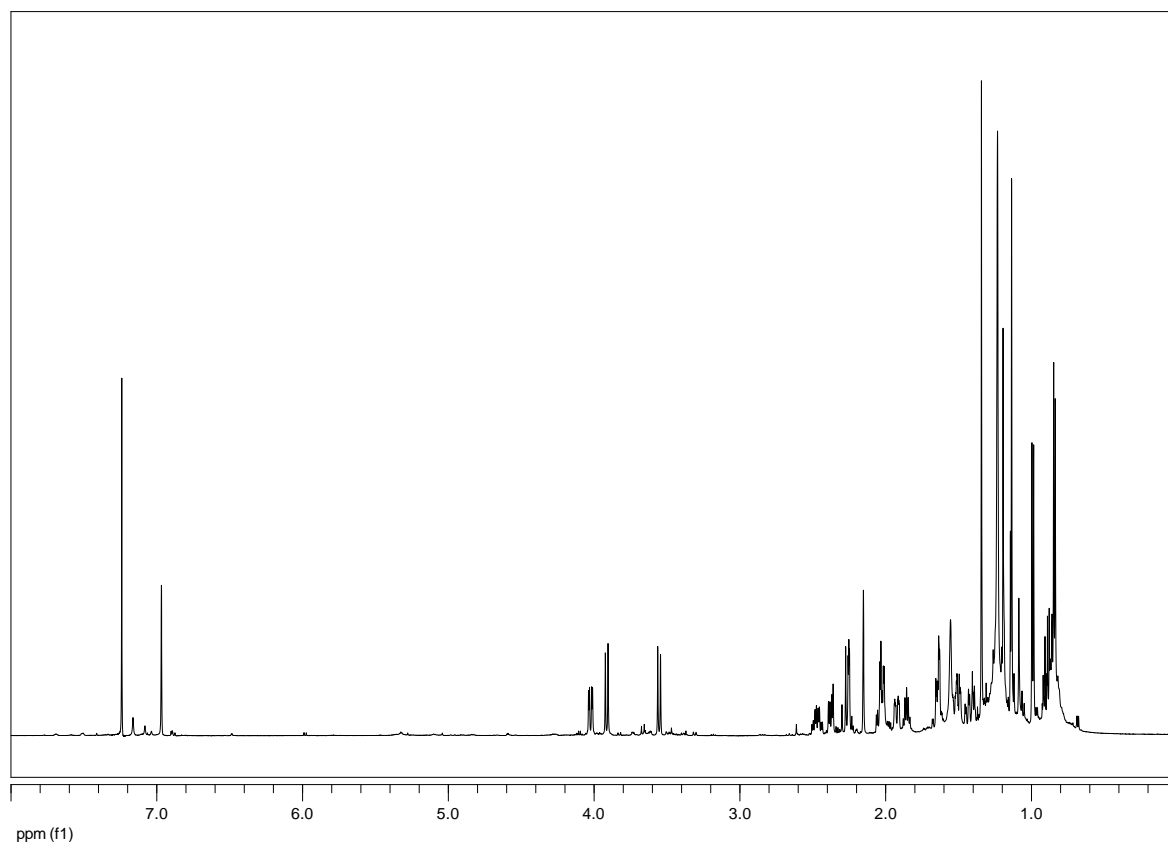

**Figure S25.** <sup>1</sup>H NMR spectrum (CDCl<sub>3</sub>, 600 MHz) of compound 7.

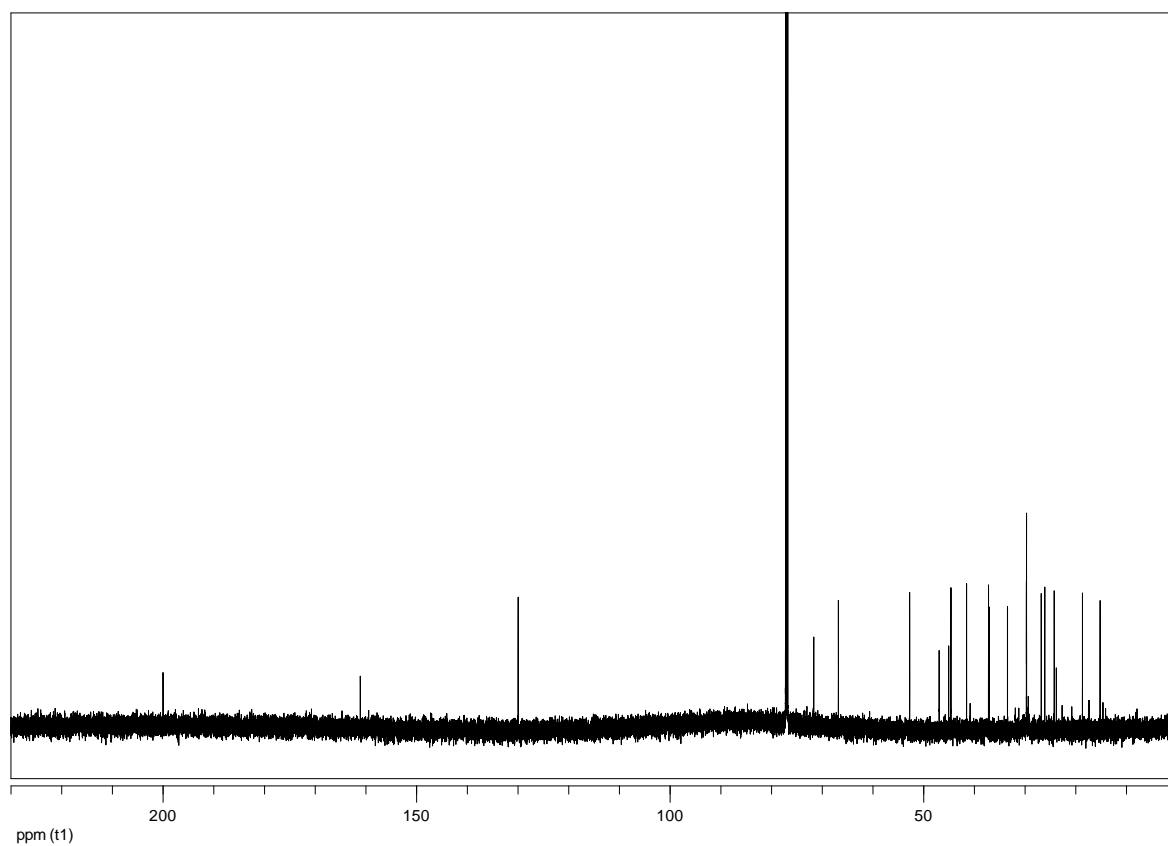

**Figure S26.** <sup>13</sup>C NMR spectrum (CDCl<sub>3</sub>, 75 MHz) of compound 7.



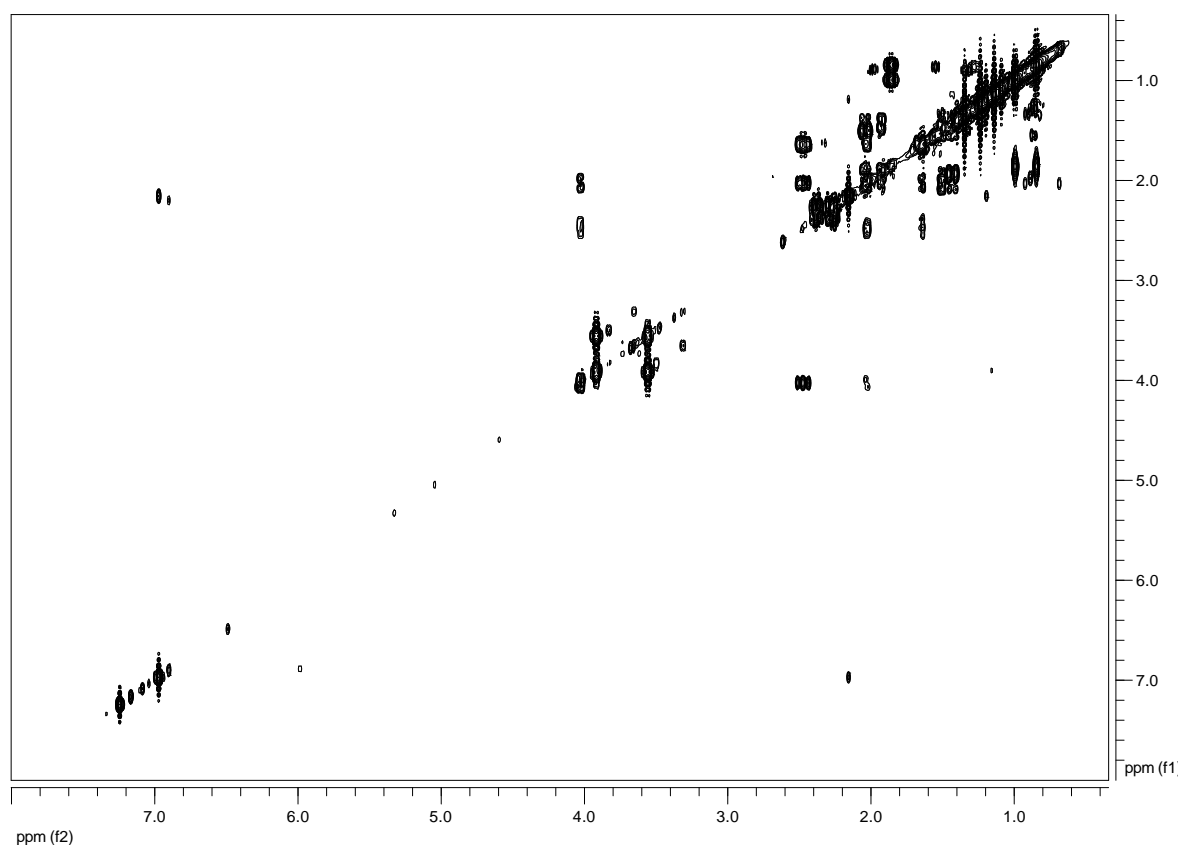

**Figure S27.** COSY spectrum ( $\text{CDCl}_3$ , 600 MHz) of compound 7.

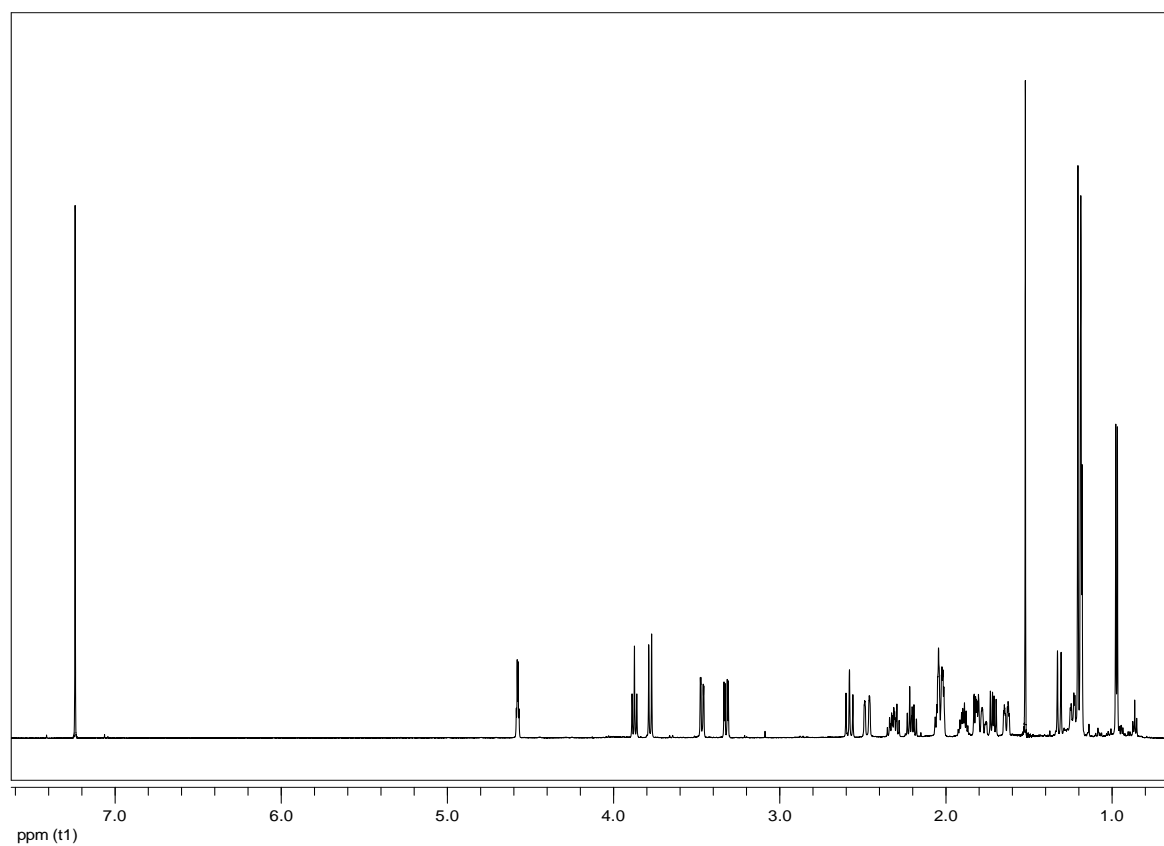

**Figure S28.**  $^1\text{H}$  NMR spectrum ( $\text{CDCl}_3$ , 600 MHz) of compound 8.

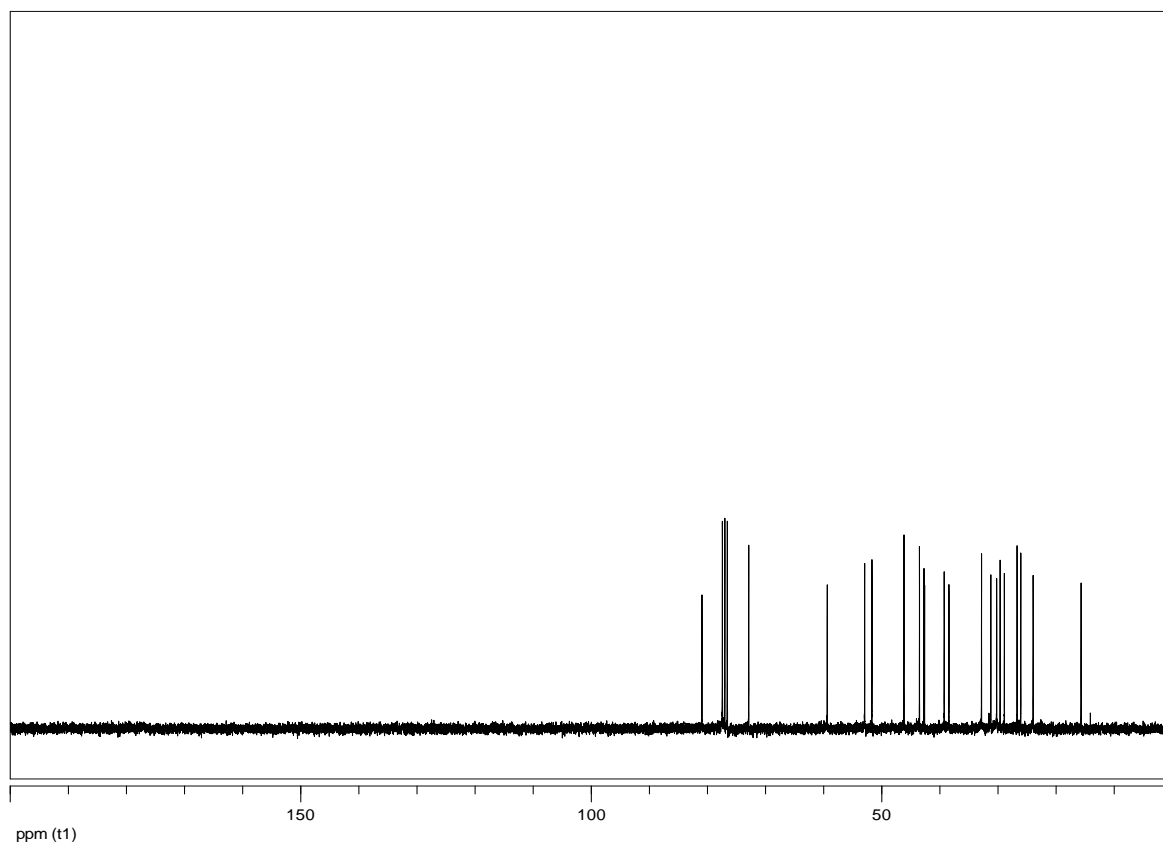

**Figure S29.**  $^{13}\text{C}$  NMR spectrum ( $\text{CDCl}_3$ , 75 MHz) of compound 8.

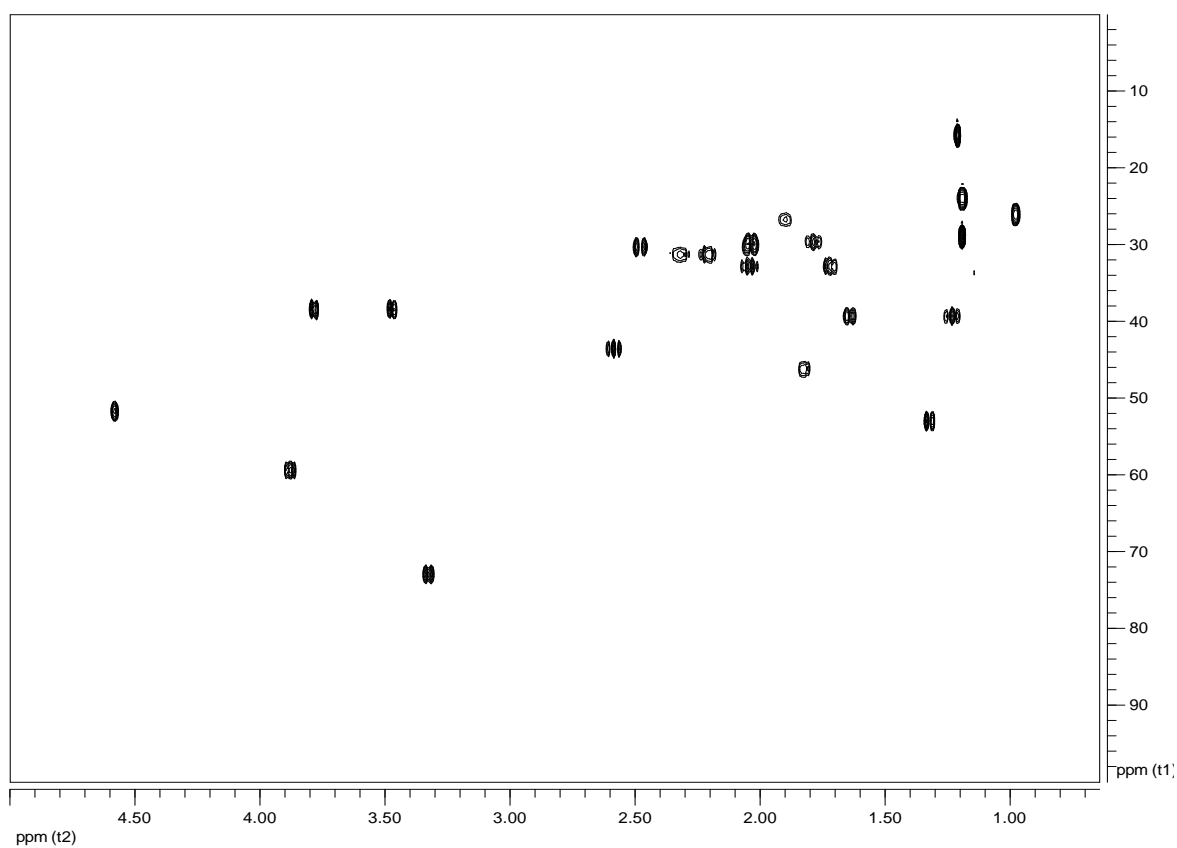

**Figure S30.** HSQC spectrum ( $\text{CDCl}_3$ , 600 MHz) of compound 8.

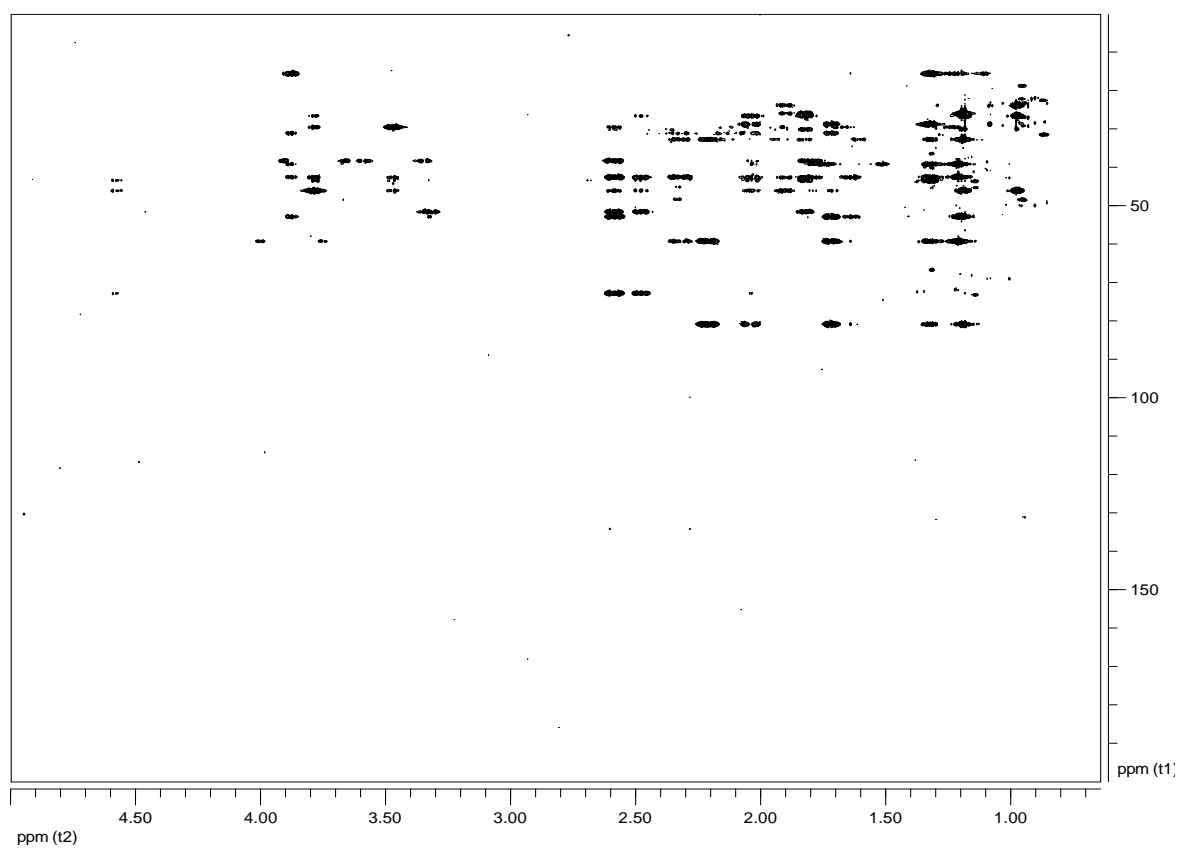

**Figure S31.** HMBC spectrum ( $\text{CDCl}_3$ , 600 MHz) of compound **8**.

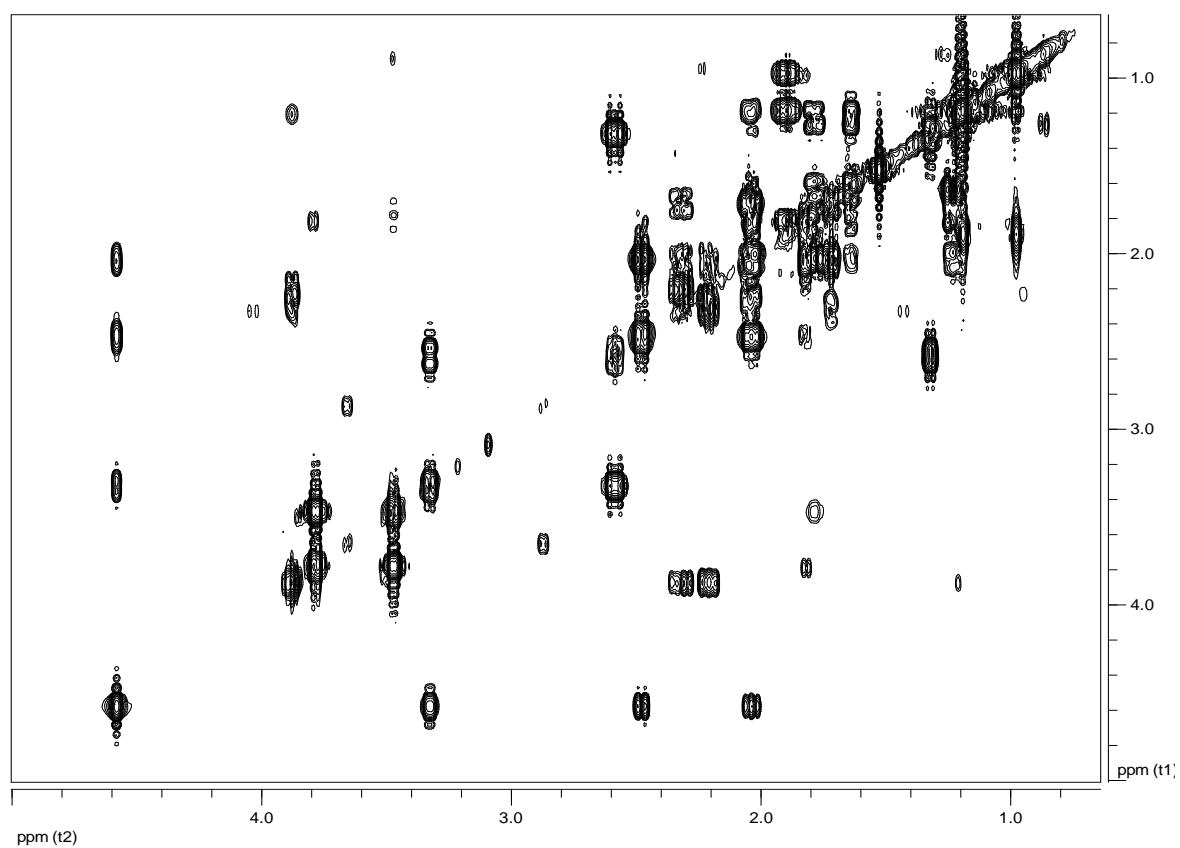

**Figure S32.** COSY spectrum ( $\text{CDCl}_3$ , 600 MHz) of compound **8**.

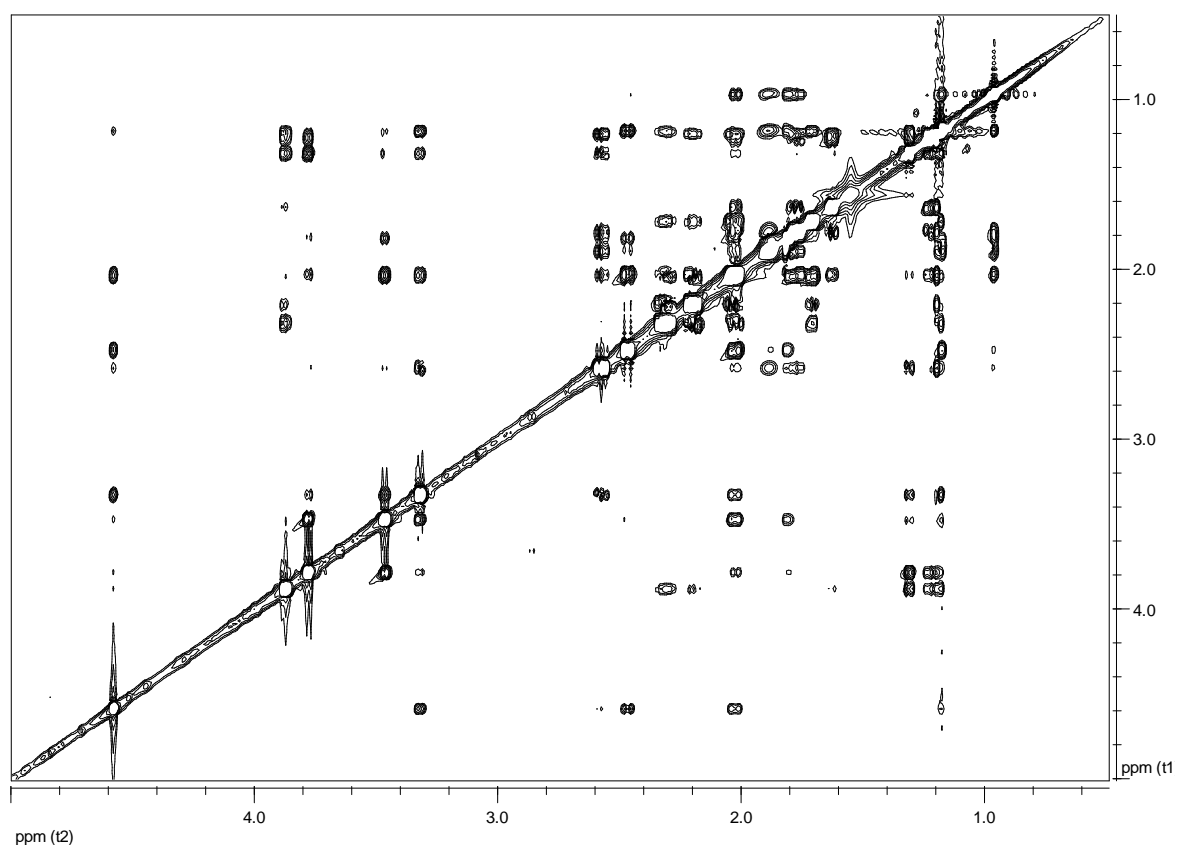

**Figure S33.** NOESY spectrum ( $\text{CDCl}_3$ , 600 MHz) of compound **8**.

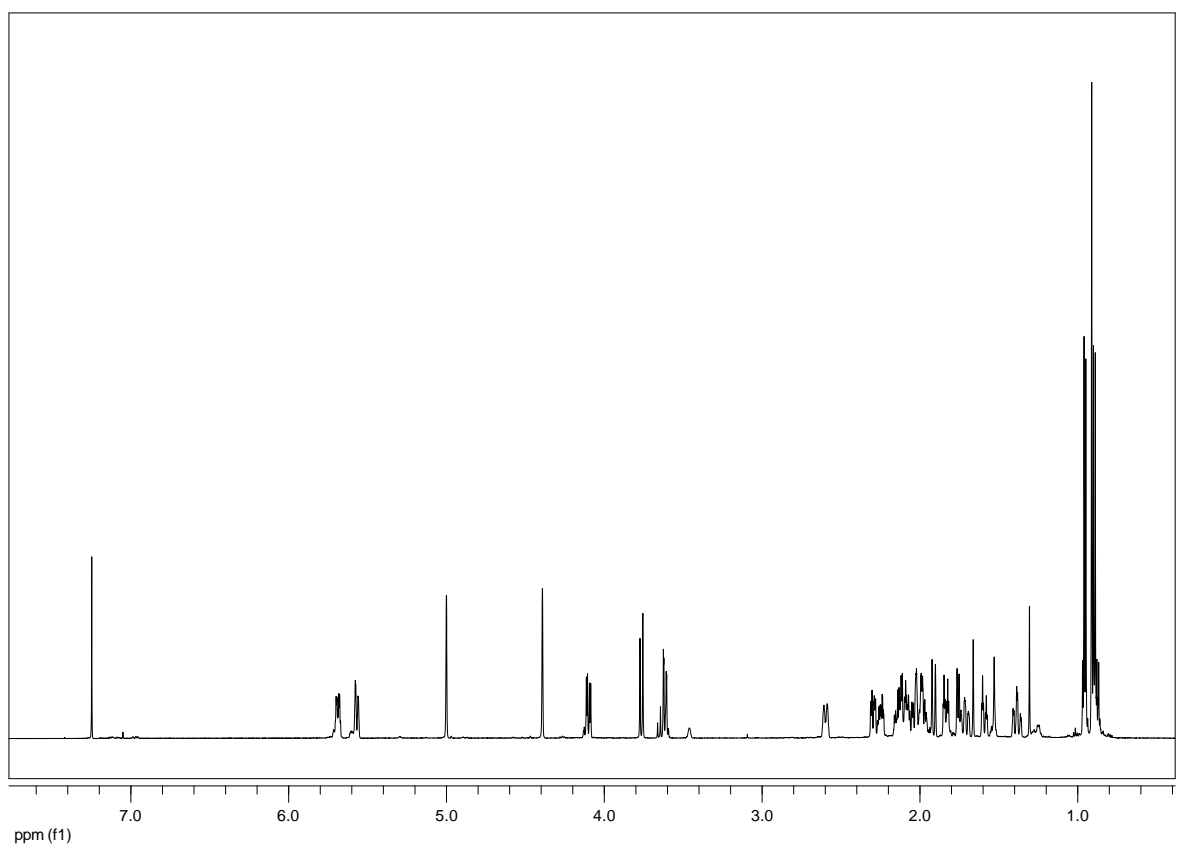

**Figure S34.**  $^1\text{H}$  NMR spectrum ( $\text{CDCl}_3$ , 600 MHz) of compound **9**.

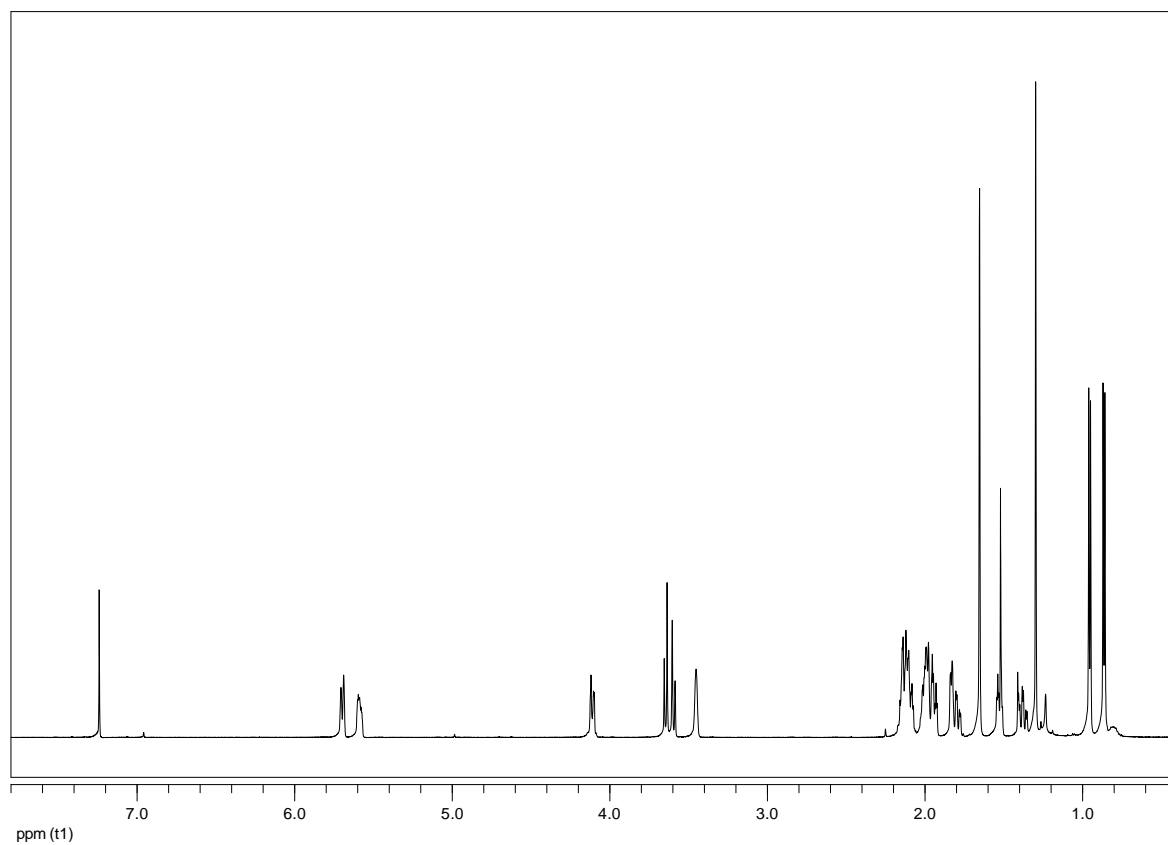

**Figure S35.**  $^1\text{H}$  NMR spectrum ( $\text{CDCl}_3$ , 600 MHz) of compound **10**.

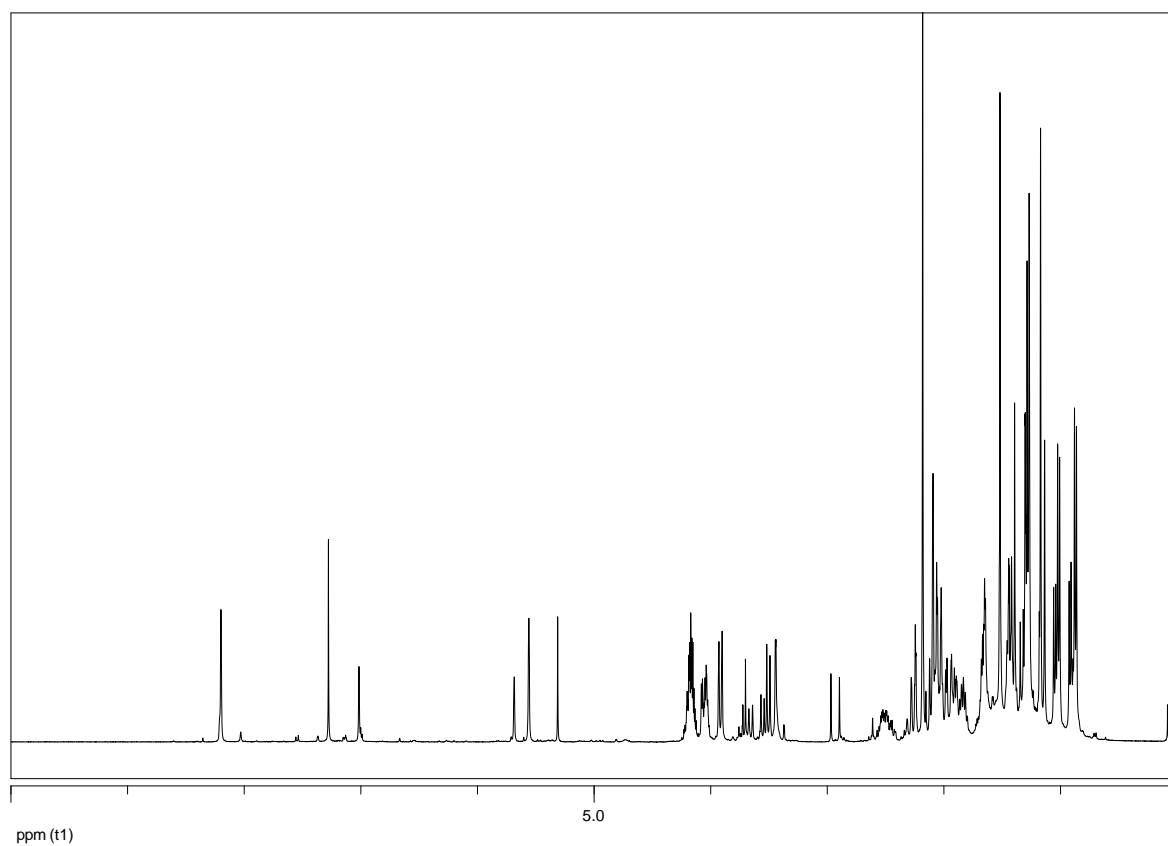

**Figure S36.**  $^1\text{H}$  NMR spectrum ( $\text{CDCl}_3$ , 600 MHz) of compound **11** (mixture of *E,Z* geometrical isomers).

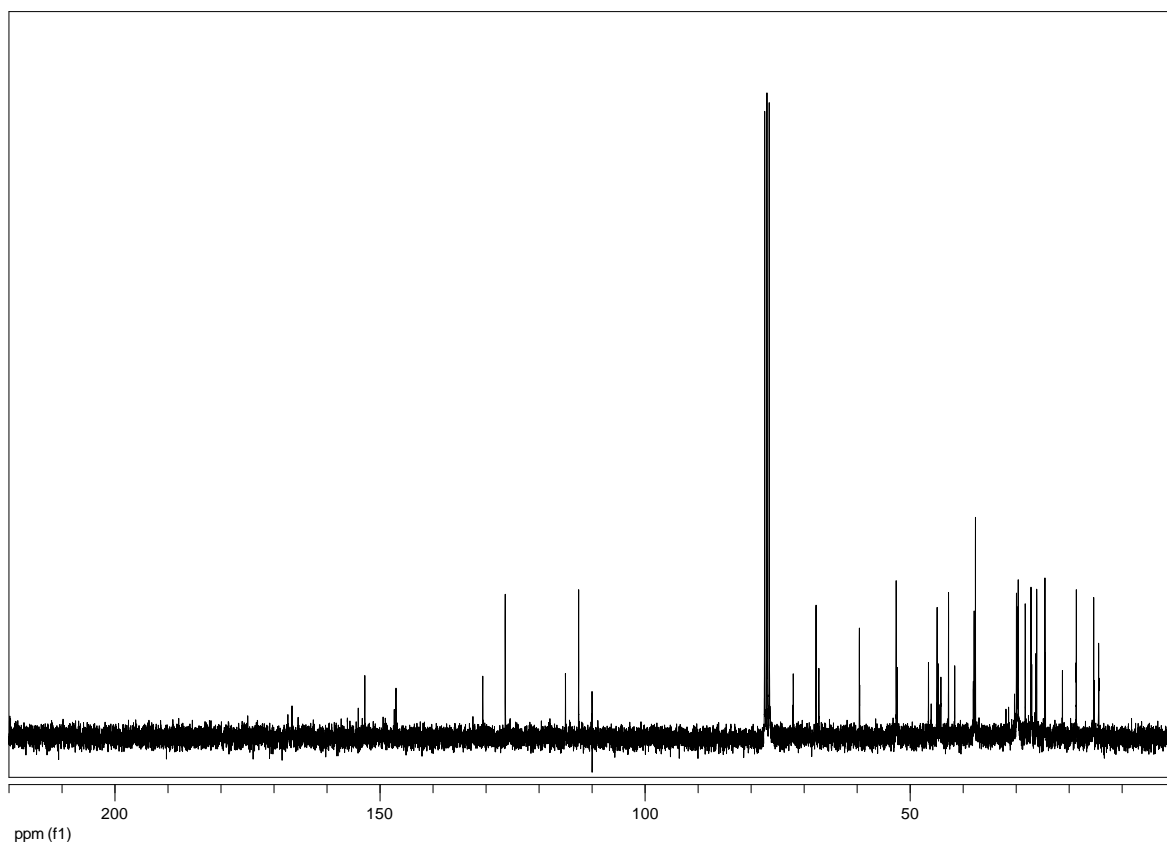

**Figure S37.**  $^{13}\text{C}$  NMR spectrum ( $\text{CDCl}_3$ , 75 MHz) of compound **11** (mixture of *E,Z* geometrical isomers).

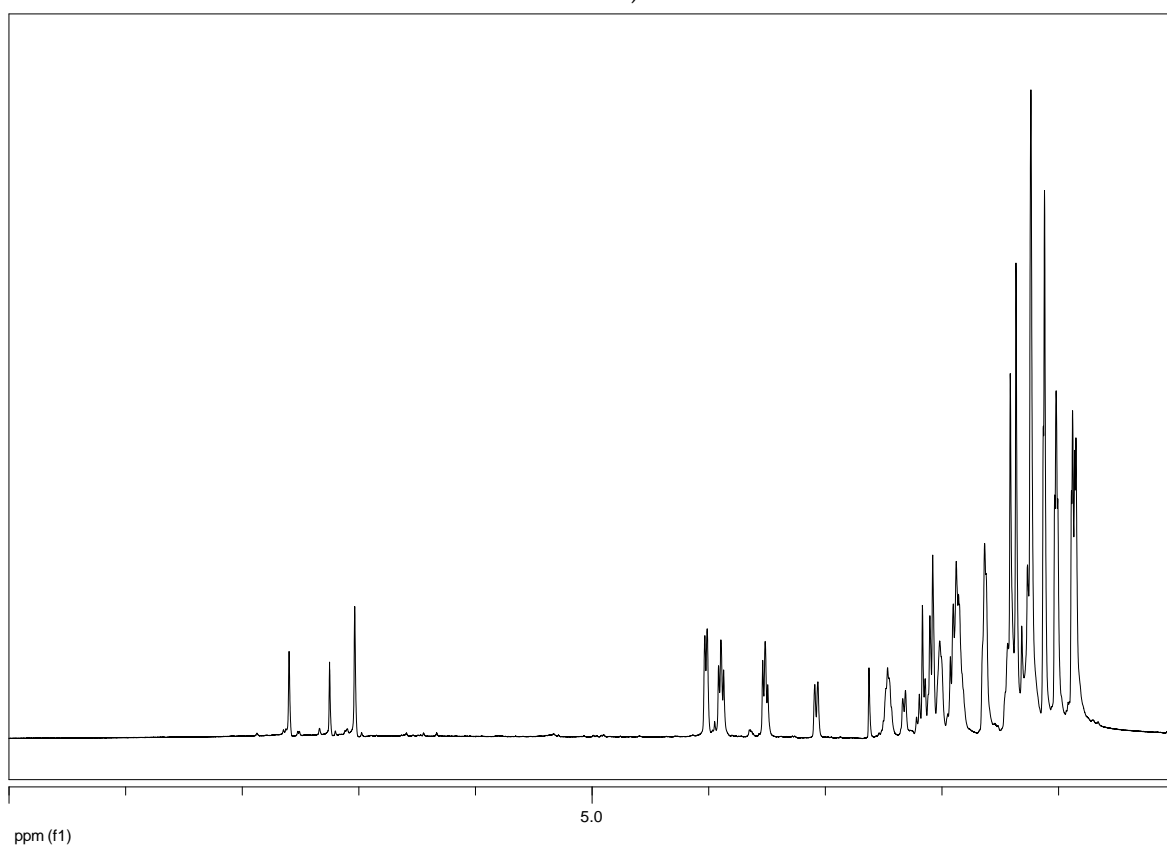

**Figure S38.**  $^1\text{H}$  NMR spectrum ( $\text{CDCl}_3$ , 600 MHz) of compound **12** (mixture of *E,Z* geometrical isomers).

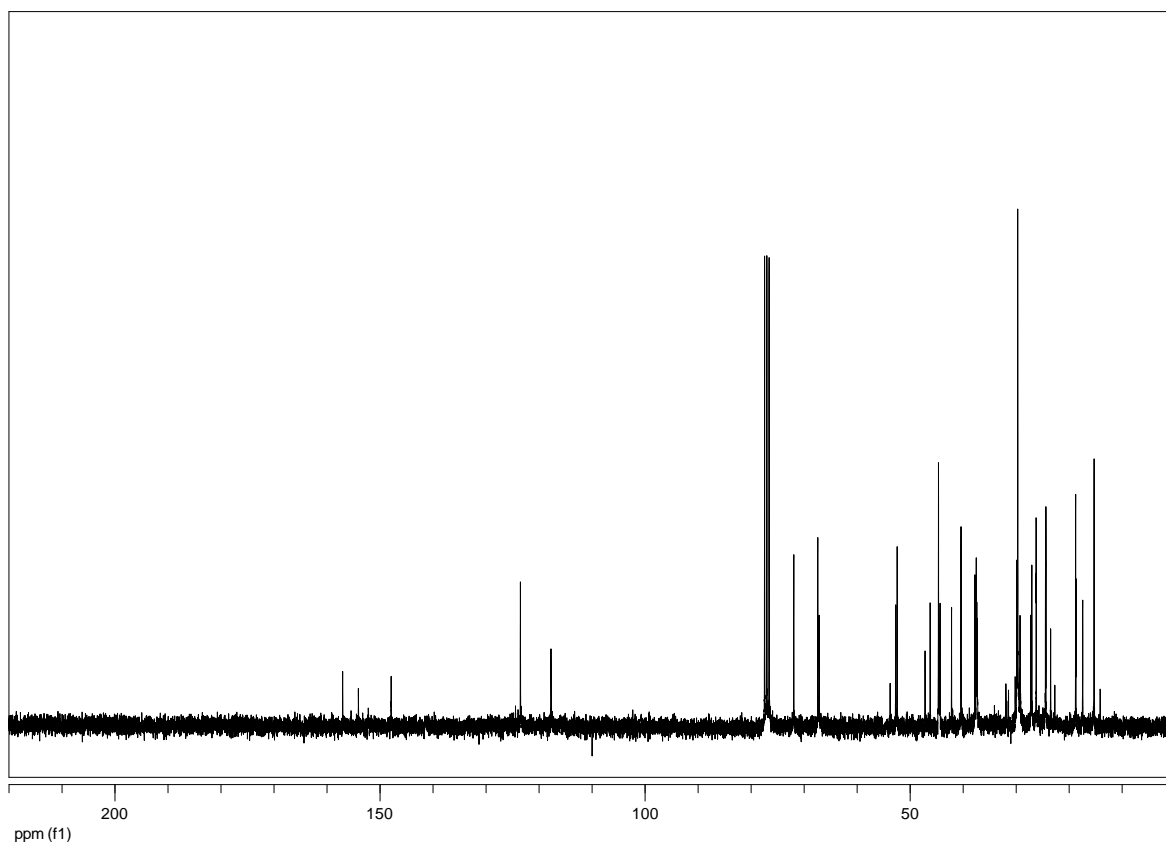

**Figure S39.**  $^{13}\text{C}$  NMR spectrum ( $\text{CDCl}_3$ , 75 MHz) of compound **12** (mixture of *E,Z* geometrical isomers).

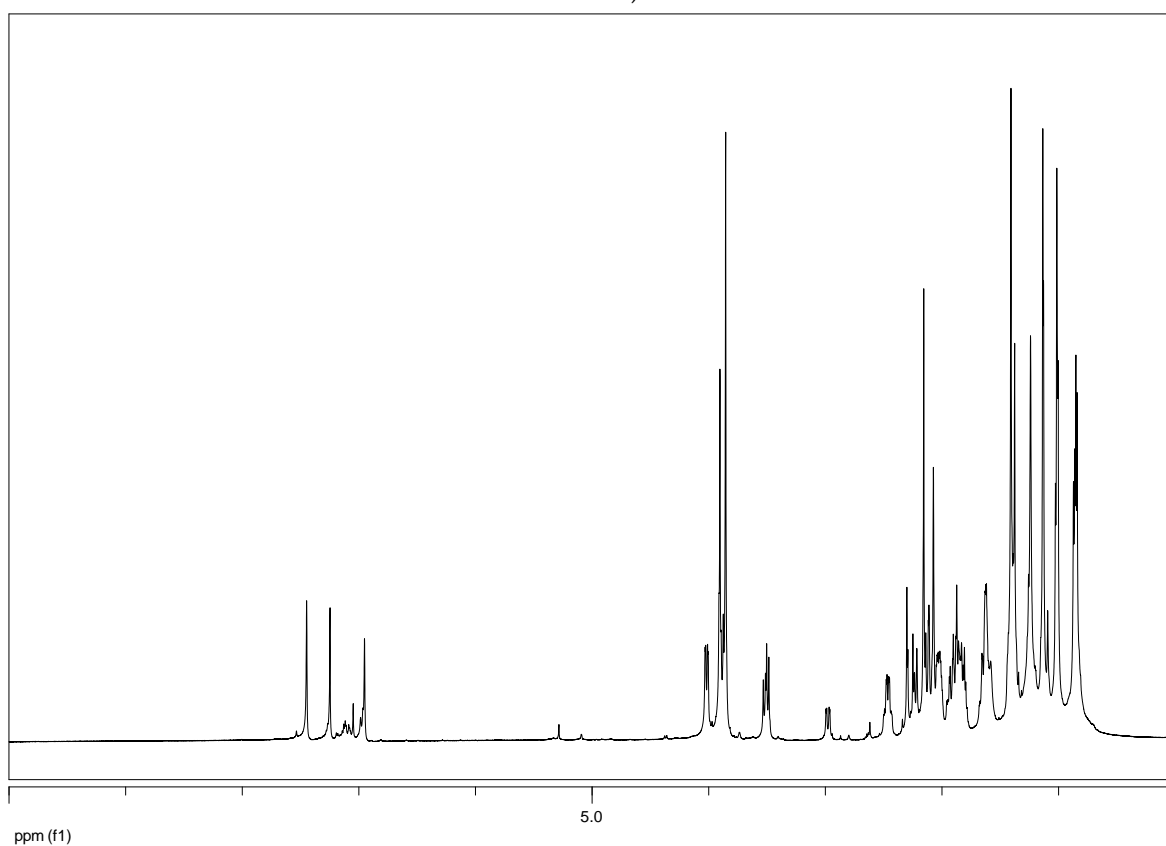

**Figure S40.**  $^1\text{H}$  NMR spectrum ( $\text{CDCl}_3$ , 600 MHz) of compound **13** (mixture of *E,Z* geometrical isomers).

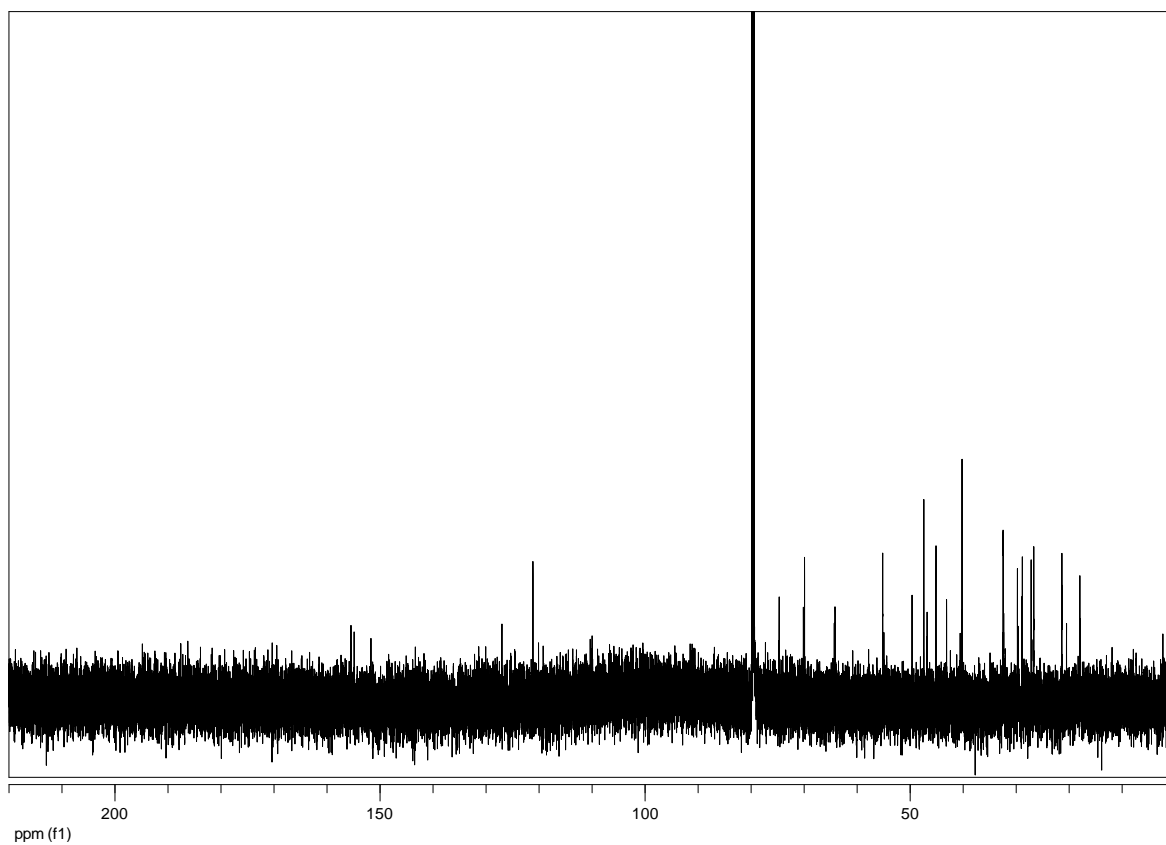

**Figure S41.**  $^{13}\text{C}$  NMR spectrum ( $\text{CDCl}_3$ , 75 MHz) of compound **13** (mixture of *E,Z* geometrical isomers).

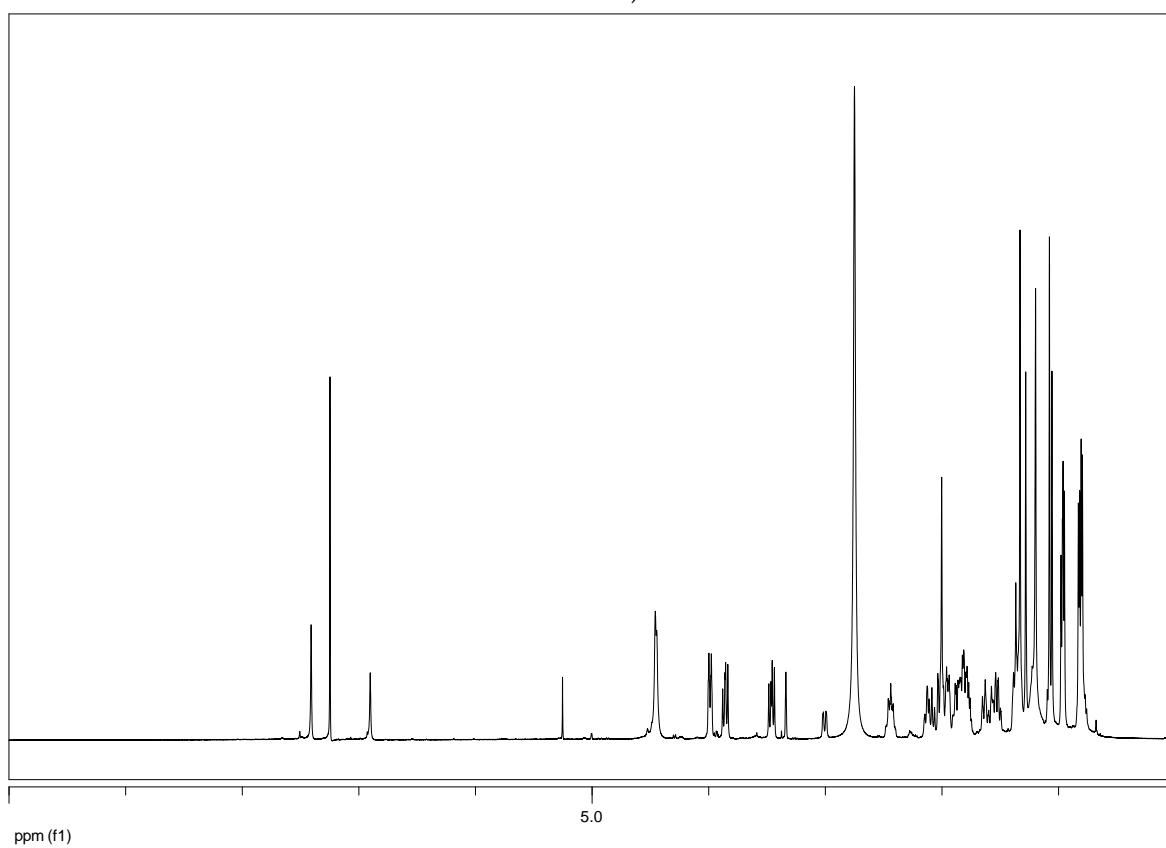

**Figure S42.**  $^1\text{H}$  NMR spectrum ( $\text{CDCl}_3 / \text{CD}_3\text{OD}$ , 600 MHz) of compound **14** (mixture of *E,Z* geometrical isomers).



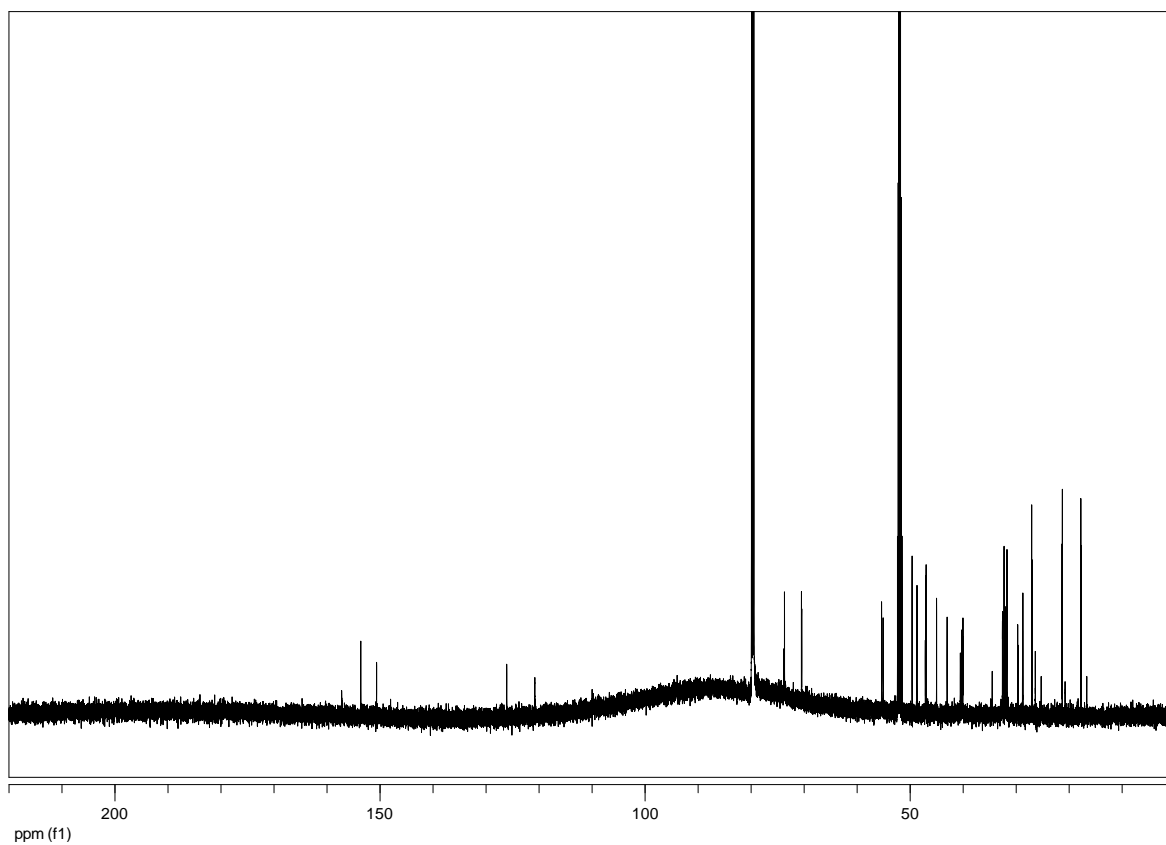

**Figure S43.**  $^{13}\text{C}$  NMR spectrum ( $\text{CDCl}_3 / \text{CD}_3\text{OD}$ , 150 MHz) of compound **14** (mixture of *E,Z* geometrical isomers).

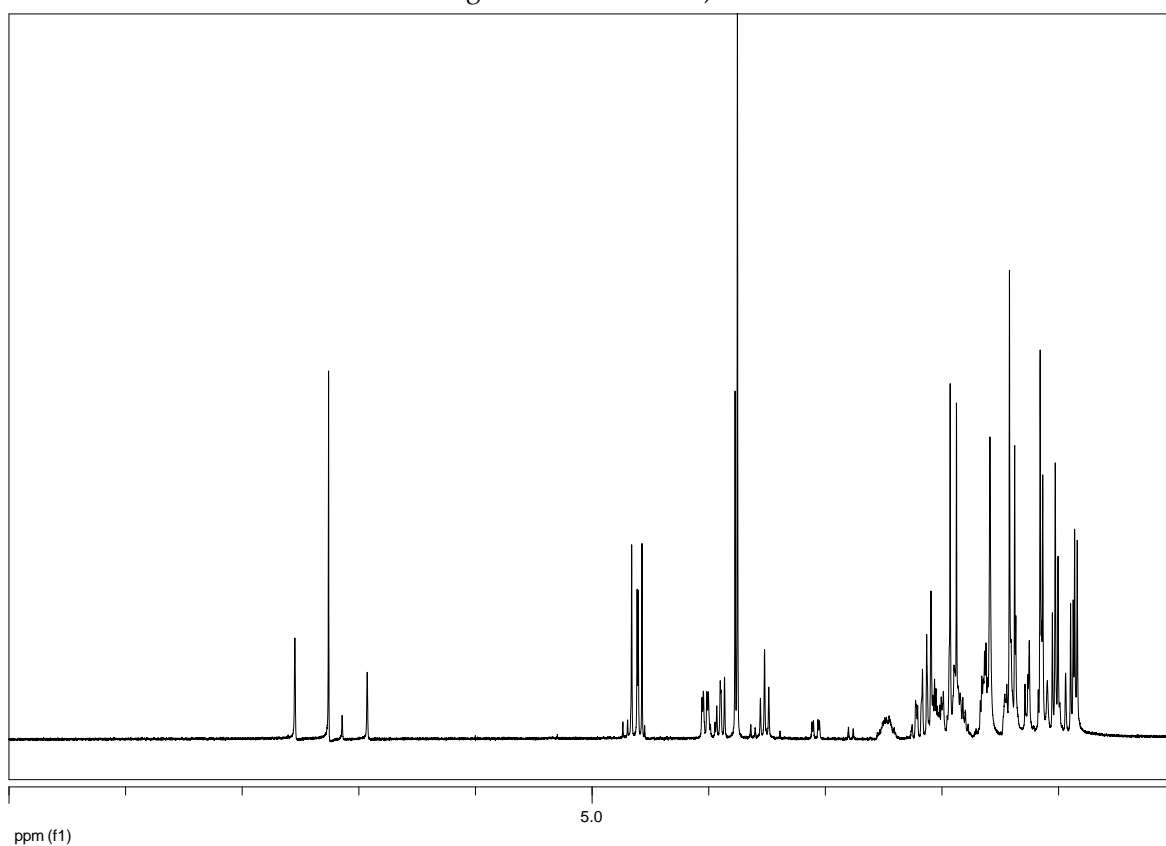

**Figure S44.**  $^1\text{H}$  NMR spectrum ( $\text{CDCl}_3$ , 300 MHz) of compound **15** (mixture of *E,Z* geometrical isomers).

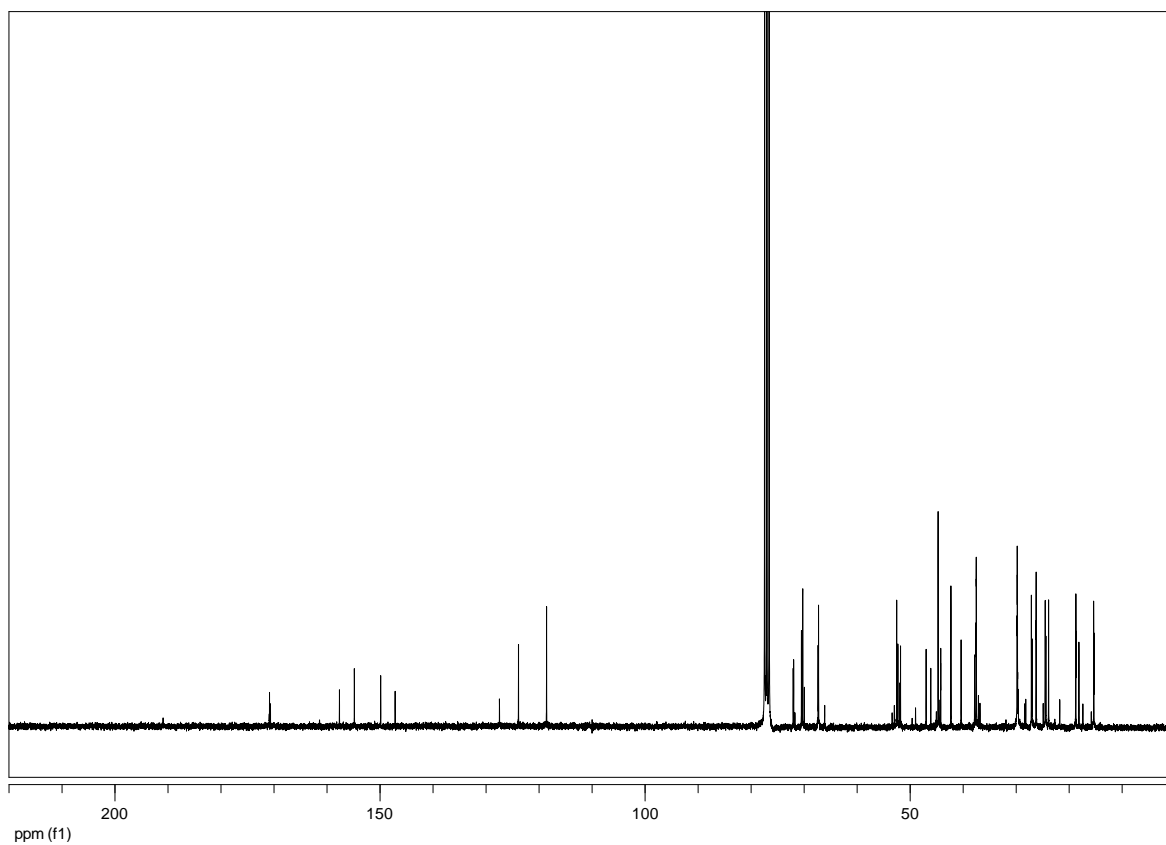

**Figure S45.**  $^{13}\text{C}$  NMR spectrum ( $\text{CDCl}_3$ , 75 MHz) of compound **15** (mixture of *E,Z* geometrical isomers).

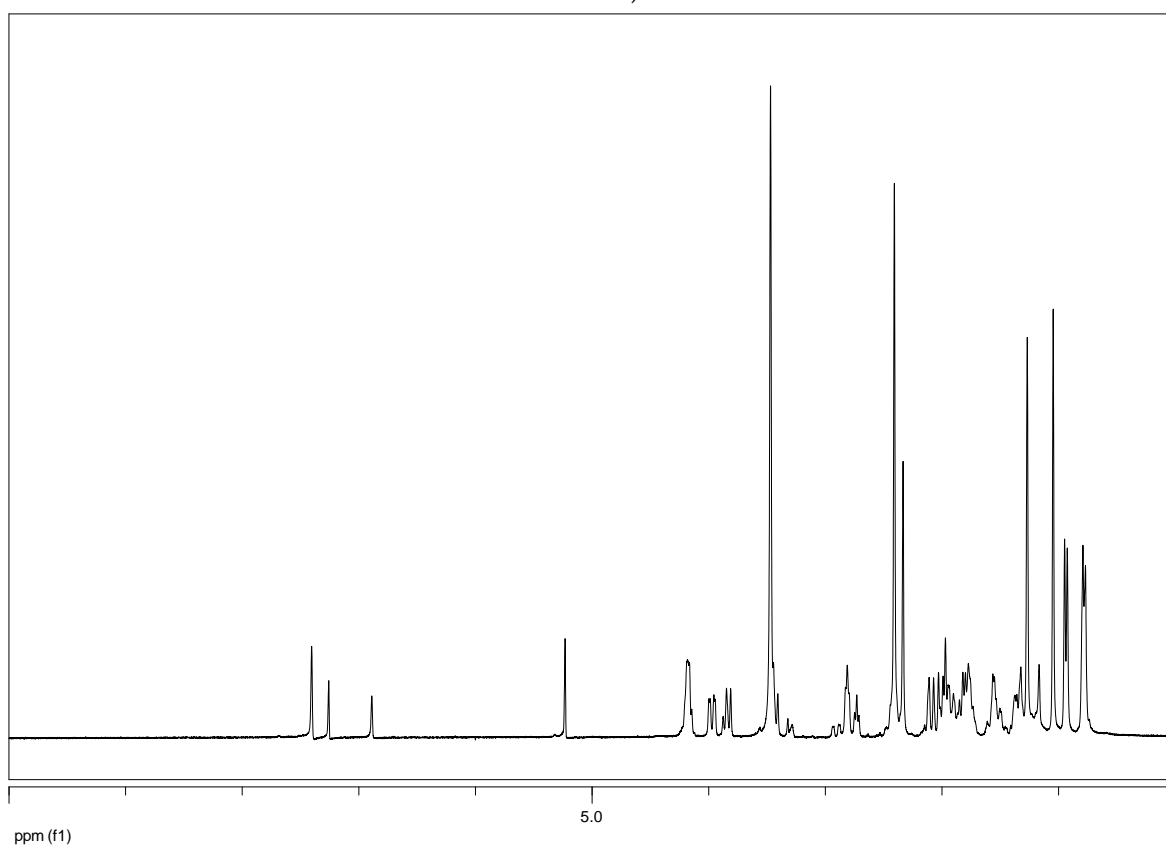

**Figure S46.**  $^1\text{H}$  NMR spectrum ( $\text{CDCl}_3 / \text{CD}_3\text{OD}$ , 300 MHz) of compound **16** (mixture of *E,Z* geometrical isomers).

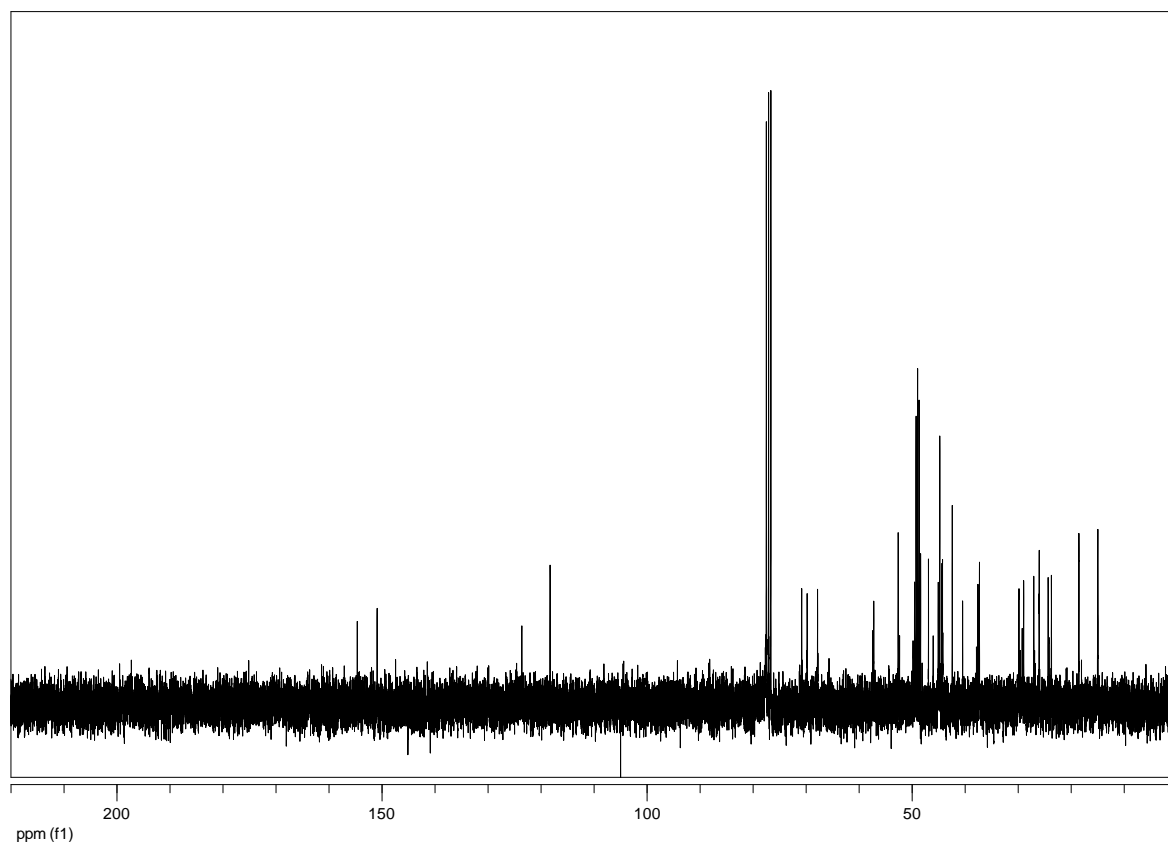

**Figure S47.**  $^{13}\text{C}$  NMR spectrum ( $\text{CDCl}_3 / \text{CD}_3\text{OD}$ , 75 MHz) of compound **16** (mixture of *E,Z* geometrical isomers).
